# 1            **WNT stimulation induced conformational dynamics in the Frizzled-** 2            **Dishevelled interaction**

3   **Authors:** Carl-Fredrik Bowin<sup>1</sup>, Pawel Kozielowicz<sup>1</sup>, Lukas Grätz<sup>1</sup>, Maria Kowalski-Jahn<sup>1</sup>,  
4   Hannes Schihada<sup>1</sup>, Gunnar Schulte<sup>1\*†</sup>

## 5   **Affiliations:**

6   <sup>1</sup>Karolinska Institutet, Dept. Physiology & Pharmacology, Sec. Receptor Biology & Signaling;  
7   Stockholm, Sweden.

8   \*Corresponding author. Email: [gunnar.schulte@ki.se](mailto:gunnar.schulte@ki.se). Phone: +46-8-524 8 7933

9   †Address: Biomedicum 6D, Solnavägen 9, S-171 65 Stockholm, Sweden

10  
11   **Abstract:** Frizzleds (FZD<sub>1-10</sub>) are G protein-coupled receptors containing an extracellular  
12   cysteine-rich-domain (CRD) that presents the orthosteric binding site of the 19 mammalian  
13   WNTs, the endogenous agonists of FZDs. FZDs signal via a diverse set of effector proteins, of  
14   which Dishevelled (DVL1-3) is the most well studied and which acts as a hub for several FZD-  
15   mediated signaling pathways. However, the mechanistic details of how FZD-DVL interaction  
16   mediate pathway initiation and provide pathway selectivity remain an enigma. Here, we use  
17   bioluminescence resonance energy transfer-based assays employing Venus-tagged DVL2  
18   together with NanoLuciferase-tagged FZD<sub>5</sub> to investigate the WNT-3A- and WNT-5A-induced  
19   dynamics of the FZD-DVL interaction. Our biophysical assessment suggests that the ligand-  
20   induced BRET changes over time originate from conformational dynamics in the FZD<sub>5</sub>-DVL2  
21   complex rather than recruitment dynamics of DVL2 to FZD<sub>5</sub>. Thus, we suggest that extracellular  
22   agonist and intracellular transducers could cooperate with each other through allosteric  
23   interaction with FZDs in a ternary complex reminiscent of that of classical GPCRs.

24 **One Sentence Summary:** Analysis of the interaction of FZD<sub>5</sub> and DVL2 uncovers WNT-  
25 induced conformational dynamics of a WNT-FZD<sub>5</sub>-DVL2 complex.

26  
27 **Main Text:**

## 28 INTRODUCTION

29 The class F of G protein-coupled receptors (GPCRs) consists of ten Frizzled paralogues (FZD<sub>1-10</sub>)  
30 and Smoothened (SMO) (1). They bear the structural hallmarks of GPCRs, having an extracellular  
31 N-terminus, seven transmembrane spanning helices (TM1-7), three extracellular loops, three  
32 intracellular loops as well as an intracellular helix 8 and a C-terminus. FZDs also contain a highly  
33 conserved cysteine-rich domain (CRD) at the N-terminus constituting the binding site for their  
34 endogenous ligands, the lipoglycoproteins of the Wingless/Int1 (WNT) family (2). FZDs are  
35 subdivided into four homology clusters, FZD<sub>1,2,7</sub>, FZD<sub>3,6</sub>, FZD<sub>4,9,10</sub> and FZD<sub>5,8</sub> (1), which interact  
36 with 19 mammalian WNTs; however, family-wide ligand-receptor selectivity as well as ligand-  
37 receptor pathway selectivity remain poorly understood, although some light was recently shed on  
38 the complexity of WNT-FZD interaction (3).

39 FZDs recruit a diverse set of effector proteins (4). The phospho- and scaffold protein Dishevelled  
40 (DVL) is the most studied and acts as a hub for multiple intracellular WNT signaling pathways  
41 (5–7). Mammals express three DVL paralogues, DVL1-3, which consist of three distinct,  
42 structured domains: the N-terminal DIX (Dishevelled and Axin) domain, the central PDZ (Post-  
43 synaptic density protein-95, Disc large tumor suppressor, Zonula occludens-1) domain, the DEP  
44 (Dishevelled, Egl-10 and Pleckstrin) domain as well as a flexible C-terminus. The DIX domain,  
45 also found in the protein Axin, readily oligomerizes leading to the formation of dynamic, cytosolic  
46 DVL puncta (8, 9). While the DIX domain is essential for WNT/ $\beta$ -catenin signaling, where it

47 forms dynamic DIX-DIX oligomers with other DVL or Axin proteins, it remains unclear how the  
48 DIX-DIX interaction integrates into the physical process of signal transduction initiated by WNT-  
49 activated FZD. The PDZ domain was initially found to interact with the conserved, but  
50 unconventional PDZ ligand KTXXXW localized in the helix 8 of FZDs (10). However, more  
51 recently the DEP domain has emerged to be the most important for FZD-DVL interaction (11, 12)  
52 and WNT/ $\beta$ -catenin signaling (13). The DEP domain is a compact ~10.5 kDa domain and consists  
53 of three  $\alpha$ -helices, a  $\beta$ -hairpin and two  $\beta$ -sheets, including a finger loop with K446 (aa numbering  
54 from human DVL2) located at the tip. Mutations in the DEP domain including the L445E and  
55 K446M mutation prevent FZD-DVL interaction, underlining the importance of this region for  
56 DVL recruitment to the plasma membrane and signal initiation (12, 13). In addition, DVL has  
57 multiple phosphorylation sites and becomes heavily phosphorylated in response to WNT signaling,  
58 detectable as an electrophoretic mobility shift (14). Kinases responsible for DVL phosphorylation  
59 include casein kinase 1 $\delta$  and  $\epsilon$  (CK1 $\delta/\epsilon$ ), casein kinase 2 and protein kinase C (5, 9, 15).

60 While the concept of dynamic FZD-DVL interaction being relevant for WNT-induced and FZD-  
61 mediated signal transduction was formulated in the late 1990s (16), the recruitment dynamics of  
62 FZD-DVL interaction were notoriously difficult to investigate (i) because DVL forms dynamic  
63 puncta due to DIX-DIX oligomerization (8), (ii) overexpressed DVL strongly interacts with  
64 overexpressed FZD already in the absence of agonist stimulation (17) and (iii) cell lysis disrupts  
65 the FZD-DVL interaction (18). Thus, ligand-induced dynamics in FZD and DVL interaction could  
66 not be assessed systematically so far. Primarily, the extent of plasma membrane recruitment of  
67 DVL, as detected by confocal microscopy, has been used as a semi-quantitative assessment of its  
68 functionality and as an indirect measure of FZD interaction (16). In recent years, employment of  
69 total internal reflection fluorescence (TIRF) microscopy revealed that DVL2 investigated at

70 endogenous levels is recruited to and oligomerizes at the plasma membrane in response to WNT-  
71 3A stimulation (19). Additionally, FZD<sub>4</sub>-DVL2 and FZD<sub>6</sub>-DVL2 interactions were investigated  
72 with bioluminescence resonance energy transfer (BRET) detecting increased BRET signal after  
73 stimulation with Norrin and WNT-5A, respectively (20, 21). Although these findings add  
74 important knowledge to the field, they do not provide mechanistic insights for FZD-DVL  
75 interaction.

76 The question whether the FZD-DVL interaction is dynamic presents a major gap in the current  
77 understanding of how DVL functions to transduce WNT-induced signaling downstream of FZDs.  
78 Therefore, we investigated the kinetics and dynamics of WNT-induced FZD<sub>5</sub>-DVL2 complex  
79 rearrangements by employing BRET sensors. This biophysical analysis in living cells revealed (i)  
80 FZD<sub>5</sub>-mediated increase in BRET signal between FZD and DVL2 (or DVL2-DEP) in response to  
81 WNT-3A and -5A, (ii) the importance of the DEP domain of DVL2 for FZD<sub>5</sub>-DVL2 recruitment  
82 and dynamics after WNT stimulation and (iii) an oligomerization-independent conformational  
83 change in the WNT-stimulated FZD<sub>5</sub>-DVL2 complex. Our data suggest that extracellular agonist  
84 and intracellular transducer cooperate with each other through an allosteric interaction with FZDs  
85 in a ternary complex reminiscent of that of classical GPCRs (22), where transmembrane allosteric  
86 cooperativity is essential for the interpretation of WNT binding towards DVL dynamics.

87

## 88 **RESULTS**

### 89 **Venus-DVL2 is recruited to FZD<sub>5</sub>-Nluc**

90 While we have used a bystander BRET setup with NanoLuciferase-tagged DVL2 (Nluc-DVL2)  
91 and a plasma membrane-anchored yellow fluorescent protein (Venus-KRas) together with FZDs

92 to investigate ligand-independent, basal plasma membrane recruitment of DVL2 (23), this system  
93 was less suited to investigate the dynamic relationship between FZD and DVL upon WNT  
94 stimulation in more detail. This setup measures predominantly plasma membrane association.  
95 Therefore, we optimized a direct BRET setup based on an N-terminally tagged Venus-DVL2 and  
96 C-terminally tagged HA-FZD<sub>5</sub>-Nluc (FZD<sub>5</sub>-Nluc) (Fig. 1A), which could allow to distinguish  
97 recruitment from complex conformational changes. We first validated these fusion proteins by  
98 quantifying WNT-independent, basal recruitment of Venus-DVL2 to co-expressed FZD-Nluc by  
99 an acceptor titration approach (see Fig. S1A for surface expression of FZD<sub>5</sub>-Nluc). Therefore, a  
100 fixed amount of FZD<sub>5</sub>-Nluc was co-transfected with increasing amounts of Venus-DVL2 into  
101 HEK293T FZD<sub>1-10</sub> knockout ( $\Delta$ FZD<sub>1-10</sub>) cells. The BRET signal for FZD<sub>5</sub>-Nluc saturated with  
102 increasing expression of the acceptor construct (Fig. 1B). In this assay, we employed the  $\beta_2$   
103 adrenoceptor ( $\beta_2$ AR)-Nluc as a negative control. Here, increasing expression of the DVL2  
104 acceptor construct resulted in a linear, non-saturable increase in the BRET signal indicative of  
105 random and unspecific interaction between these two proteins (24, 25). The titration curve allowed  
106 us to determine a suitable ratio of expression levels between Venus- and Nluc-tagged constructs  
107 for further experiments, where saturation of DVL2 recruitment to FZD<sub>5</sub> in the basal state is  
108 important to ensure consistency between experiments. Additionally, the basal recruitment of DVL  
109 by FZDs is independent of endogenously produced WNTs (17, 21). In order to validate the  
110 constitutive, ligand-independent DVL2 recruitment by FZD<sub>5</sub> co-expression also in the current set-  
111 up we used the porcupine inhibitor C59 (Fig. S1B). Porcupine inhibitors prevent the maturation  
112 and secretion of WNT proteins and allow thereby to create conditions with severely reduced  
113 autocrine WNT input (26). Since no differences in BRET between FZD<sub>5</sub> and DVL2 were detected

114 in the absence or presence of C59, we did not include the porcupine inhibitor in subsequent  
115 experiments.

### 116 **WNTs induce a concentration-dependent change in FZD<sub>5</sub>-DVL2 interaction**

117 With the aim to quantify WNT-induced dynamics of FZD<sub>5</sub>-DVL2 interaction, we monitored BRET  
118 between Venus-DVL2 and Nluc-tagged FZD<sub>5</sub> in transiently transfected  $\Delta$ FZD<sub>1-10</sub> cells. After  
119 generating a baseline of the BRET signal, the cells were stimulated with increasing concentrations  
120 of either recombinant WNT-3A or WNT-5A (Fig. 1C). WNT stimulation in FZD<sub>5</sub>-Nluc transfected  
121 cells resulted in a concentration-dependent increase in the BRET signal over time for both WNT-  
122 3A and WNT-5A reaching a plateau for the high and intermediate concentrations of WNT. Again,  
123  $\beta_2$ AR-Nluc served as negative control, showing neither an increase nor a decrease in the BRET  
124 response to WNT-3A or WNT-5A treatment.

125 The data were summarized to quantify the concentration dependency of the WNT-induced FZD<sub>5</sub>-  
126 DVL dynamics. For that purpose, we plotted the signal response 30 min after stimulation to acquire  
127 a concentration response curve (Fig. 1D), which resulted in a sigmoidal curve for both WNTs,  
128 with an EC<sub>50</sub> value for WNT-3A of 230.9 ng/ml (6.2 nM) [95% CI 110.1-484.6 ng/ml (2.9-13.0  
129 nM)] and for WNT-5A of 117.9 ng/ml (3.1 nM) [95% CI 58.6-237.3 ng/ml (1.5-6.2 nM)]. When  
130 comparing the WNT-3A- and the WNT-5A-elicited responses, no statistically significant  
131 difference in the maximum  $\Delta$ BRET response was observed.

132 To control that the WNT-induced BRET response was indeed elicited by the added WNT proteins,  
133 we heat-inactivated WNT-3A. The inactivated WNT preparation did not induce an increase in the  
134 BRET response observed between Venus-DVL2 and FZD<sub>5</sub>-Nluc (Fig. S1C). We also addressed  
135 the potential importance of endogenously expressed DVL, which could compete with exogenous

136 Venus-DVL2 and thereby affect the BRET response. In order to investigate the role of  
137 endogenously expressed DVL1, 2, 3, we used triple knock out HEK293 cells devoid of DVL1, 2,  
138 3 ( $\Delta$ DVL1-3) (13). However, in the absence of endogenous DVL, the WNT-induced BRET signal  
139 between FZD<sub>5</sub>-Nluc and Venus-DVL2 still resembled the kinetics observed in  $\Delta$ FZD<sub>1-10</sub> cells (Fig.  
140 S1D). While FZD<sub>5</sub> expression results in a ligand-independent, constitutive recruitment of DVL2,  
141 the question remains, whether the observed WNT-induced  $\Delta$ BRET reports additional recruitment  
142 of DVL molecules to the surface-expressed FZDs (recruitment dynamics) or rather a  
143 conformational rearrangement in the preformed FZD<sub>5</sub>-DVL2 complex (conformational dynamics).  
144 In order to exclude the former, we used a bystander BRET set-up between the Nluc-DVL2 and  
145 membrane-anchored Venus (Venus-KRas) in the presence of untagged FZD<sub>5</sub>, similar to what we  
146 have published previously (Fig. 2A) (23, 27). If WNT stimulation of FZD<sub>5</sub> would lead to additional  
147 recruitment of Nluc-DVL2 to the membrane, the bystander BRET would report an increased  
148 proximity of Nluc-DVL2 to Venus-KRas. However, neither WNT-3A nor WNT-5A stimulation  
149 (1  $\mu$ g/ml), which resulted in a substantial  $\Delta$ BRET in the direct BRET approach shown in Fig. 1C,  
150 elicited any changes in the bystander BRET read-out (Fig. 2B). Thus, these data support the  
151 hypothesis that the observed BRET changes in the direct BRET set-up originate from complex  
152 rearrangement (conformational dynamics) rather than additional recruitment of new DVL  
153 molecules to membrane-embedded FZDs (recruitment dynamics). To validate the ability of the  
154 bystander BRET assay to measure changes in DVL2 membrane recruitment, we used digitonin-  
155 induced membrane permeabilization. While basal bystander BRET recordings prior digitonin  
156 reported on the constitutive FZD<sub>5</sub>-mediated DVL2 recruitment, the decrease upon digitonin  
157 treatment and the lower BRET values subsequent to permeabilization emphasize the sensitivity of  
158 the approach to record plasma membrane recruitment of DVL2 (Fig. 2C).

## 159 **Oligomerization-deficient DVL2 responds to WNT stimulation**

160 While full activation of the WNT/ $\beta$ -catenin signaling pathway requires the functional DIX domain  
161 of DVL to allow for the accumulation of  $\beta$ -catenin (28), we hypothesized that the WNT- induced  
162 dynamics in the FZD-DVL interaction assessed by BRET is independent of DVL2  
163 oligomerization. The mutant DVL2-M2/M4 harbors two mutations in the DIX domain resulting in  
164 an oligomerization-deficient protein (8). Thus, we used a Venus-DVL2-M2/M4 construct to assess  
165 the role of DVL-DVL oligomerization for the FZD-DVL interplay. First, we validated basal  
166 interaction of Venus-DVL2-M2/M4 with FZD<sub>5</sub>-Nluc in a BRET acceptor titration experiment.  
167 Despite the lower expression levels of Venus-DVL2-M2/M4 compared to wildtype Venus-DVL2  
168 we observed an expression-dependent, saturable and thus specific interaction with FZD<sub>5</sub> but not  
169  $\beta_2$ AR (Fig. 3A). We then investigated the WNT-induced FZD-DVL dynamics with this mutant as  
170 done previously with the wildtype Venus-DVL2. The WNT-3A- and WNT-5A-induced kinetic  
171 responses for Venus-DVL2-M2/M4 and FZD<sub>5</sub>-Nluc were similar to the results obtained with  
172 wildtype Venus-DVL2 (Fig. 3B). In order to determine the WNT-induced rate constant  $k$  of the  
173 conformational dynamics within the FZD-DEP complex, we fitted each individual experiment  
174 with a plateau followed by one phase association equation (Fig. S2A-B). No significant differences  
175 were found when comparing the respective WNT-induced conformational dynamic rate constant,  
176  $k$ , between Venus-DVL2 and Venus-DVL2-M2/M4 (Fig. 3C), emphasizing that oligomerization  
177 hardly contributes to the observed conformational dynamics.

## 178 **FZD-DVL dynamic response is independent of LRP5/6**

179 DVL is a central mediator of  $\beta$ -catenin-dependent and -independent WNT signaling; however  
180 mechanistic details remain unclear (5). One of the current working models for signal perception



181 and pathway initiation is based on a signalosome mechanism, where WNTs bind simultaneously  
182 to both FZDs and low-density lipoprotein receptor-related protein 5/6 (LRP5/6) initiating  
183 DVL/Axin oligomerization (29–31). While this concept appears valid for WNTs that activate the  
184 WNT/ $\beta$ -catenin pathway, WNT-5A, which generally activates  $\beta$ -catenin-independent signaling,  
185 also binds LRP5/6 without feeding into the WNT/ $\beta$ -catenin pathway (32). In order to address the  
186 role of LRP5/6 as WNT co-receptors and their involvement in mediating the agonist-induced FZD-  
187 DVL dynamics, we employed recombinant Dickkopf-related protein 1 (DKK1), which acts as a  
188 WNT/ $\beta$ -catenin signaling pathway inhibitor by binding LRP5/6, preventing the formation of the  
189 signalosome complex (33, 34). Therefore, we employed our BRET setup using Venus-DVL2 and  
190 FZD<sub>5</sub>-Nluc in  $\Delta$ FZD<sub>1-10</sub> cells and treated them with 300 ng/ml of either WNT-3A or WNT-5A in  
191 the absence or presence of 300 ng/ml of recombinant DKK1. While the DKK1 concentration used  
192 in these experiments abrogated WNT-3A-induced WNT/ $\beta$ -catenin signaling (Fig. 3D), the  
193 addition of DKK1 did not affect the BRET response induced by WNT-3A or WNT-5A (Fig. 3E),  
194 clearly separating LRP5/6-dependent signalosome formation from the WNT-induced FZD<sub>5</sub>-DVL2  
195 dynamics observed in the BRET assay.

196 To further manifest the independency of the WNT-induced FZD-DVL dynamics from LRP5/6, we  
197 used HEK293 cells devoid of LRP5/6 ( $\Delta$ LRP5/6). In order to assess ligand-induced effects, we  
198 transiently transfected  $\Delta$ LRP5/6 cells with Venus-DVL2 and FZD<sub>5</sub>-Nluc and monitored the BRET  
199 signal before and after stimulation with WNT-3A or WNT-5A. These experiments revealed a  
200 similar response pattern with saturating curves and similar rate constants, despite an overall weaker  
201  $\Delta$ BRET signal (Fig. S3A-C). The weaker response in the  $\Delta$ LRP5/6 cells likely originated from the  
202 lower transfection efficiency, which is visualized as values for luciferase and Venus counts in  
203 comparison to  $\Delta$ FZD<sub>1-10</sub> cells (Fig. S3D). Taken together, these data argue that WNT-induced

204 FZD<sub>5</sub>-DVL2 dynamics are independent of LRP5/6 and could precede formation of the WNT-3A-  
205 induced signalosome.

## 206 **The DEP domain of DVL responds to WNT stimulation**

207 During recent years, the DEP domain has emerged as the primary interaction site between DVL  
208 and FZDs (12, 13). This statement is further corroborated by an acceptor titration BRET  
209 experiment employing the Venus-tagged DVL2 lacking the DEP domain ( $\Delta$ DEP DVL2) in  
210 combination with Nluc-tagged FZD<sub>5</sub> or  $\beta_2$ AR (negative control). While FZD<sub>5</sub> recruited full length  
211 DVL2 (Fig. 1B), the BRET amplitude in the presence of FZD<sub>5</sub>-Nluc with increasing levels of  
212  $\Delta$ DEP Venus-DVL2 was not different from that of the negative control (Fig. S4A), asserting the  
213 DEP domain as the major FZD-interaction site (16). As previously surmised (4), we wanted to  
214 employ a minimal DVL domain to address the question whether the complexity of FZD-DVL  
215 interaction and most importantly their ligand-induced conformational dynamics can be reduced to  
216 the minimal DEP domain, serving as a conformational sensor for basal and WNT-activated FZDs.  
217 For this purpose, we fused Venus to the C-terminus of the DEP domain (aa S418-G510) of human  
218 DVL2 (DEP-Venus) (Fig. 4A; see also Supplementary Materials & Methods). Titration of DEP-  
219 Venus with a fixed amount of FZD<sub>5</sub>-Nluc (Fig. 4B) emphasized saturable and specific interaction  
220 with FZD<sub>5</sub>-Nluc already at very low expression levels, indicating high affinity between FZD<sub>5</sub> and  
221 DEP, in line with previous findings employing microscopy-based assessment of FZD-DEP  
222 interaction (11, 12, 17). Furthermore, both WNT-3A and WNT-5A elicited a dynamic BRET  
223 response between FZD<sub>5</sub>-Nluc and DEP-Venus (Fig. 4C) and the response for FZD<sub>5</sub>-Nluc reached  
224 a plateau after stimulation with both WNT-3A and WNT-5A. The concentration response for  
225 FZD<sub>5</sub>-Nluc also reflected what we observed with Venus-DVL2, with an EC<sub>50</sub> value for WNT-3A  
226 of 110.1 ng/ml (2.9 nM) [95% CI 49.9-243.1 ng/ml (1.3-6.5 nM)] and for WNT-5A of 277.5 ng/ml

227 (7.3 nM) [95% CI 150.7-511.1 ng/ml (4.0-13.5 nM)] (Fig. 4D). Intriguingly, there was a more  
228 pronounced difference between the WNT-3A and WNT-5A response, indicative of distinct WNT  
229 subtype-dependent complex formation between FZD<sub>5</sub> and DEP. Additionally, we used inactivated  
230 WNT-3A, which was unable to elicit a BRET response, as a control (Fig. S4B). Also, there was  
231 no difference in the rate constants of the WNT-induced kinetic  $\Delta$ BRET response of DVL2 and  
232 DEP (Fig. 4E, S5A), further asserting DEP as a conformational sensor of FZD-DVL interaction  
233 and dynamics.

### 234 **Mutational analysis of FZD-DEP dynamics**

235 To investigate the FZD-DEP interaction and BRET conformational dynamics in more detail, we  
236 employed previously described DEP mutants (Fig. 5A) (11–13). While these mutants have  
237 previously been investigated for their recruitment to FZD<sub>5</sub> by confocal microscopy in the absence  
238 of WNT stimulation, we aimed here to employ kinetic BRET experiments to better understand the  
239 impact of DEP mutations on WNT-induced conformational dynamics in a FZD<sub>5</sub>-DEP complex.  
240 The G436P mutant was reported to be impaired in its ability to form DEP dimers, allowing us to  
241 address the role of DEP dimers for the WNT-induced FZD-DEP dynamics. The K446M mutant,  
242 localized at the tip of the DEP finger loop, was reported to block recruitment of DEP and full  
243 length DVL2 to FZD<sub>5</sub>, potentially pinpointing an interaction site between FZD and DEP. Lastly,  
244 the L445E mutant – adjacent to K446M in the DEP finger loop – was also reported to be unable  
245 to bind FZD<sub>5</sub> both as a DEP construct and full length DVL2. All these mutations in full length  
246 DVL2 impair WNT/ $\beta$ -catenin signaling (13). First, we assessed the basal recruitment of the three  
247 mutants to FZD<sub>5</sub>- and  $\beta$ <sub>2</sub>AR-Nluc (the latter used as a negative control) with BRET acceptor  
248 titrations (Fig. 5B-D). While we could confirm that the G436P DEP dimer mutant interacts with  
249 FZD<sub>5</sub>, albeit with a lower saturation BRET<sub>max</sub> and reduced BRET<sub>50</sub> as compared to wildtype DEP

250 (Fig. 5B, E), we could also detect recruitment of the K446M mutant to FZD<sub>5</sub>. This interaction,  
251 however, also presented with a reduced saturation BRET<sub>max</sub> and BRET<sub>50</sub> (Fig. 5C, E).  
252 Furthermore, we did not detect any specific interaction between FZD<sub>5</sub> and the DEP L445E mutant,  
253 corroborating previous results (Fig. 5D, E) (11). Therefore, we continued to investigate the WNT-  
254 induced FZD<sub>5</sub>-DEP conformational dynamics with the FZD-interacting G436P and K446M DEP  
255 mutants (Fig. 6A-B). They both presented with conformational dynamic FZD-DEP ΔBRET  
256 responses upon WNT-3A and WNT-5A stimulation. Thus, the dimer deficient DEP G436P mutant  
257 and the finger loop K446M mutant maintain the conformational dynamic BRET response over  
258 time, albeit with a different kinetic profile. In order to determine kinetic parameters such as a the  
259 WNT-induced rate constant  $k$  and BRET<sub>max</sub> of the conformational dynamics within the FZD-DEP  
260 complex, we fitted each individual experiment with a plateau followed by one phase association  
261 equation (Fig. S5B-C). It should be noted that the comparison of kinetic BRET<sub>max</sub> between mutants  
262 is compromised by their differences in the saturation BRET<sub>max</sub> values reported in Fig. 5E. On the  
263 other hand, rate constants can be compared between the groups. Thus, the assessment of FZD-DEP  
264 interaction by BRET extends our possibilities to distinguish constitutive (ligand-independent)  
265 recruitment of DEP to FZD and ligand-elicited conformational dynamics suggesting  
266 conformational rearrangement in the FZD-DEP interface as a hallmark of WNT/FZD signal  
267 initiation. We found that the DEP G436P mutant presented with a significantly increased kinetic  
268 rate with both WNT-3A and WNT-5A stimulation compared to wildtype DEP (Fig. 6C). Further,  
269 the DEP K446M mutant showed an increased kinetic rate with WNT-5A stimulation compared to  
270 wildtype DEP. Comparing WNT-3A and WNT-5A induced kinetic ΔBRET<sub>max</sub>, we observed a  
271 difference for both wildtype DEP and DEP G436P, but not for DEP K446M (Fig. 6D).

272

## 273 **DISCUSSION**

274 DVL plays a central role in both  $\beta$ -catenin-dependent and -independent WNT signaling but the  
275 mechanistic contribution of constitutive recruitment and ligand-induced dynamics in the FZD-  
276 DVL interplay remains obscure. While WNT-induced recruitment dynamics, referring to the  
277 recruitment of cytosolic DVL to FZD, have been postulated since the discovery of FZD-mediated  
278 DVL recruitment to the plasma membrane, a suitable quantitative assay methodology has so far  
279 not been available to investigate FZD-DVL dynamics. As pointed out already in 2012,  
280 understanding the dynamic interplay between FZD and DVL will provide essential mechanistic  
281 details to grasp FZD-mediated WNT pathway selectivity (12). Here, we fill this knowledge gap  
282 and employ a sensitive BRET approach to shed light onto the WNT-elicited conformational rather  
283 than recruitment dynamics in the FZD-DVL interaction in living cells. While this approach is  
284 suitable to study the interplay between FZD and full length DVL, we also explore the use of a  
285 minimal DEP domain as a BRET partner, which generally recapitulates the WNT-induced FZD-  
286 DVL conformational dynamics and allows to decipher important details in this interface at the  
287 crossroads of the WNT signaling system. It should also be noted that this experimental approach  
288 is suitable to assess WNT-induced dynamics in the interplay of DVL with other proteins, such as  
289 the transmembrane proteins ROR1/2, RNF43 or LRP5/6, to name but a few.

290 The DEP domain of DVL is important for signal transduction (13) and for FZD-DVL interaction  
291 in the basal state (11, 12, 16, 17). With the help of TIRF microscopy, it was previously shown that  
292 WNT-3A stimulation has an effect on DVL oligomerization and its recruitment to the plasma  
293 membrane (19). In addition, direct BRET was also employed to assess the effect of Norrin  
294 stimulation on FZD<sub>4</sub>-DVL2 interaction (20). Despite these recent advances, contradictory results  
295 point in opposite directions. While the above-mentioned results advocate an increase in FZD-DVL

296 recruitment and DVL-DVL oligomerization at the plasma membrane, it was also concluded that  
297 the FZD<sub>5</sub>-DEP interaction decreases in response to WNT-3A stimulation (11) and that WNT-3A  
298 stimulation had no effect on DVL oligomerization or plasma membrane recruitment (35). Our  
299 BRET analysis allows to resolve molecular details behind FZD-DVL interaction dynamics, and  
300 we conclude that acute WNT stimulation affects the constitutively formed FZD-DVL complex. As  
301 BRET depends upon both the distance and dipole orientation between acceptor and donor (36),  
302 direct BRET data could be interpreted either as a change in FZD<sub>5</sub>-DVL2 recruitment or an  
303 alteration in the overall conformation of the FZD<sub>5</sub>-DVL2 complex. However, provided (i) that the  
304 experimental conditions favor FZD-DVL saturation prior to WNT stimulation, (ii) the absence of  
305 a response in the bystander BRET set up (Fig. 2C) and (iii) the DVL2-M2/M4 oligomerization-  
306 deficient mutant still induced a BRET response (Fig. 3B), we argue that the reported WNT-induced  
307  $\Delta$ BRET response reflects conformational dynamics in a pre-formed FZD-DVL or FZD-DEP  
308 complex. Given the similar BRET profiles and rate constants in response to WNTs using either  
309 wildtype DVL2 or DVL2-M2/M4, we can separate WNT-induced FZD-DVL dynamics from  
310 WNT-induced DVL-DVL oligomerization. Furthermore, because there is a substantial basal FZD-  
311 DVL interaction and the BRET assays are performed at the saturated end of the spectrum, meaning  
312 that the equilibrium is heavily shifted towards basal FZD-DVL interaction, it is reasonable to  
313 assume that a large part of the membranous FZD population is already bound to DVL2. As a  
314 consequence, in the present experimental system acute WNT stimulation does most likely not lead  
315 to a significant increase in DVL recruitment to yet unbound FZDs, supported by our bystander  
316 BRET data (Fig. 2C). Therefore, we interpret the WNT-induced  $\Delta$ BRET as a rearrangement in the  
317 pre-existing FZD-DVL complex, which implicates a WNT-induced conformational change in the  
318 core of FZD, analogous to ligand-controlled, allosteric receptor/transducer coupling known from

319 other GPCR families (4). Thus, it is of utmost importance to underline that the experimental  
320 conditions used in our work, where most surface expressed FZDs are bound to a DVL (or DEP)  
321 molecule, allow us to differentiate ligand-induced recruitment dynamics from conformational  
322 dynamics in the FZD/DVL or FZD/DEP complex. We surmise that DVL dynamics in cells with  
323 physiological DVL expression levels present as a composite response consisting of WNT-induced  
324 recruitment and conformational dynamics.

325 The observation that the minimal DEP domain recapitulates the WNT-induced dynamics observed  
326 with full length DVL2, including similar rate constants (Fig. 4E), argues that the DEP domain  
327 serves as a conformational sensor of a FZD conformation that is active with regard to DVL  
328 interaction. This is particularly relevant in the light of previous findings showing that the mutation  
329 of the conserved molecular switch in TM6 and TM7 of FZDs improves the likelihood of the agonist  
330 bound FZD<sub>5</sub> to recruit a mini-G protein at the same time as it abrogates the basal recruitment of  
331 DVL2 to FZD<sub>5</sub> (23). In combination, these findings argue for a conformational selection of  
332 transducer interaction, where distinct FZD conformations are required to feed into DVL vs G  
333 protein interaction and signaling. Moreover, the difference in the WNT-3A- and WNT-5A-induced  
334 FZD<sub>5</sub>-DEP BRET response is intriguing, where we observed that WNT-5A elicited a larger kinetic  
335  $\Delta\text{BRET}_{\text{max}}$  compared to WNT-3A (Fig. 6D). Two likely explanations for this are that (i) the two  
336 WNTs stabilize different receptor conformations or (ii) they stabilize the same conformation but  
337 with different probabilities (37, 38).

338 In order to better understand the general importance of FZD-DVL dynamics for WNT-induced  
339 FZD signaling, we have chosen FZD<sub>5</sub>, which is intensively studied and which both initiates the  
340 WNT/ $\beta$ -catenin pathway and interacts with and activates heterotrimeric G proteins in a WNT-  
341 dependent fashion (12, 13, 23, 39, 40).

342 In an effort to further dissect the observed WNT-induced FZD-DVL dynamics, we made use of  
343 three DEP mutants previously reported to interfere with FZD-DVL recruitment and downstream  
344 WNT/ $\beta$ -catenin signaling<sup>3,6-9</sup>. The DEP G436P and K446M mutants were both recruited to FZD<sub>5</sub>  
345 albeit with a slightly reduced affinity (represented by BRET<sub>50</sub>) for FZD<sub>5</sub> (Fig. 5E). Thus, the  
346 mutations affect FZD-DEP binding suggesting that the finger loop (K446M) itself and the region  
347 at its base (G436P) are important for the FZD-DEP interface. The DEP L445E mutant, which is  
348 part of the finger loop in the DEP domain, was not recruited to FZD<sub>5</sub>, further corroborating the  
349 importance of the DEP finger loop for FZD<sub>5</sub>-DEP interaction. Interestingly, microscopy-based  
350 analysis indicated that the DEP K446M mutant does not bind to FZD<sub>5</sub> (*11*); the more quantitative  
351 approach of BRET analysis, however, was able to detect the weakened interaction of this DEP  
352 mutant with its receptors, clearly underlining the advantageous dynamic range of the BRET-based  
353 approach (Fig. 5C).

354 With regard to the WNT-induced kinetics, we observed a drastic reduction of the  $\Delta$ BRET<sub>max</sub>  
355 response observed between FZD<sub>5</sub> and DEP K446M compared to wildtype DEP in response to both  
356 WNT-3A and WNT-5A. Most importantly, the efficacy differences of WNT-3A and WNT-5A  
357 observed for the FZD-DEP conformational dynamics were abrogated in the experiments  
358 performed with mutant DEP K446M (Fig. 6D). Thus, our data suggest that the finger loop is not  
359 only important for basal FZD-DEP interaction but also central for WNT-induced FZD<sub>5</sub>-DEP  
360 dynamics. Regarding the G436P DEP mutant, we observed a higher efficacy for WNT-3A  
361 compared to WNT-5A (Fig. 6D). Thus, this DEP mutation affects the FZD-DEP interaction in a  
362 WNT-selective manner arguing that WNT-3A and WNT-5A stabilize distinct FZD conformations  
363 that show more or less efficient DEP interaction, respectively. Furthermore, the DEP G436P  
364 mutation increased the rate constants (Fig. 6C) for the WNT-induced BRET changes, suggesting



365 that this structural change in the DEP domain evoked by the mutation is either involved in FZD  
366 interaction or that DEP dimerization could present a rate-limiting step affecting agonist-induced  
367 conformational kinetics (11). In summary, our mutational analysis allowed us to distinguish  
368 between constitutive FZD-DEP interaction, WNT-induced conformational dynamics and WNT-  
369 selective processes as part of an agonist-induced functional selectivity in a WNT-FZD<sub>5</sub>-DEP  
370 complex.

371 Based on the current working model of WNT/ $\beta$ -catenin signaling, WNTs bind FZD and LRP5/6  
372 to allow for recruitment of DVL and formation of the signalosome complex (30). We tested this  
373 model and concluded that WNTs induce FZD-DVL conformational dynamics independently of  
374 LRP5/6, clearly suggesting that (i) WNT-FZD interactions can occur independently of LRP5/6,  
375 that (ii) agonist-induced FZD-DVL dynamics potentially precede LRP5/6 signalosome formation  
376 and that (iii) WNT-induced conformational changes of FZDs regulate the initial communication  
377 with DVL in a receptor complex reminiscent of the ternary complex described for agonist- and  
378 effector-bound GPCRs (4, 22). The emerging concept of conformational dynamics of FZDs is in  
379 agreement with general concepts of GPCR activation (41) and is further supported by previously  
380 reported WNT concentration response curves for fluorescence changes in cpGFP-tagged FZD  
381 conformational sensors (3) and the WNT-induced dynamics of the cysteine-rich domain of FZDs  
382 that precede alterations in core conformation (42). Thus, WNT-induced pathway selection and  
383 signal initiation of FZDs is not only determined by their proximity to different co-receptors but  
384 appears to be – at least in part – determined by a conformational selection of WNT-FZD-DVL  
385 interaction.

386 In summary, the data presented here support the notion that WNT binding to FZD<sub>5</sub> results in  
387 conformational dynamics of the FZD-DVL interaction supportive of a cooperative, allosteric

388 interaction in a WNT-FZD-DVL complex. These conformational FZD<sub>5</sub>-DVL dynamics are DVL  
389 oligomerization-independent, and the evidence points to a ligand-selective FZD conformation-  
390 driven process at the interface between FZD and the DEP finger loop. While this concept is  
391 supported by the current and previously published data, additional structural insight is required to  
392 understand how conformational rearrangement of the WNT-FZD-DVL complex initiates  
393 downstream signaling and how its function is integrated with ligand-induced signalosome  
394 formation and the formation of WNT-FZD-G protein complexes (4).

395

## 396 **MATERIALS AND METHODS**

### 397 **Cell culture**

398 For all experiments,  $\Delta$ FZD<sub>1-10</sub> HEK293T cells were used if nothing else was stated.  $\Delta$ FZD<sub>1-10</sub>  
399 HEK293T cells (43) and  $\Delta$ LRP5/6 HEK293 T-Rex cells (44) were cultured in DMEM (HyClone  
400 SH30081) supplemented with 10% fetal bovine serum and 1% penicillin/streptomycin (Thermo  
401 Fisher Scientific 10270106 and 15140) in a humidified incubator at 37 °C and 5% CO<sub>2</sub>. All cell  
402 culture plastics were from Sarstedt unless stated otherwise. For cell transfection,  $\Delta$ FZD<sub>1-10</sub> or  
403  $\Delta$ LRP5/6 cells were transiently transfected in suspension using Lipofectamine 2000 (Thermo  
404 Fisher Scientific 11668). An approximately 80-90% confluent T-75 flask was re-suspended in 20  
405 ml yielding a suspension with  $4\text{-}5 \times 10^5$  of cells ml<sup>-1</sup>. A total of 1  $\mu$ g of DNA was used to make 1  
406 ml of transfected cell suspension and was always filled up with empty pcDNA3.1 plasmid. Plasmid  
407 amounts used in a transfection are later presented as percentage (%) of total plasmid DNA used in  
408 that transfection, e.g. 2% of Nluc plasmid DNA is defined as 20 ng of Nluc plasmid DNA used to  
409 transfect  $4\text{-}5 \times 10^5$  of cells in 1 ml.

## 410 **Cloning and plasmids**

411 Venus-DVL2 was subcloned from FLAG-DVL2 (Addgene #24802) into pVenus-C1 with HindIII  
412 and BamHI. HA-FZD<sub>5</sub>-Nluc was cloned using prolonged-overlap-extension (POE) PCR  
413 techniques. ΔDEP Venus-DVL2 was cloned with the Q5 Site-Directed Mutagenesis kit (NEB  
414 #E0554S) using Venus-DVL2 as a template. Venus-DVL2-M2/M4 was generated using the  
415 GeneArt Site-directed mutagenesis kit (Thermo Fisher Scientific). DEP-Venus was cloned from a  
416 gBlock (Supplementary Information text) into mVenus-N1 (Addgene #27793) using HindIII and  
417 BamHI restriction sites. The β<sub>2</sub>AR-Nluc construct was cloned by fusing Nluc to the C-terminus of  
418 FLAG-SNAP-β<sub>2</sub>AR using XbaI and NotI restriction sites and DNA fragment ligation. Nluc-DVL2  
419 was generated and validated previously (REF to Mol switch paper). HA-FZD<sub>5</sub> was from Thomas  
420 Sakmar and Venus-KRas was from Nevin Lambert.

## 421 **Ligands**

422 Recombinant human WNT-3A and human/mouse WNT-5A were from RnD Systems/Biotechnie  
423 (#5036-WN, #645-WN). WNTs were dissolved to 100 μg/ml in filter-sterilized 0.1% BSA in PBS  
424 (HyClone) and stored at 4 °C. WNTs were diluted in filter-sterilized 0.1% BSA in HBSS  
425 (HyClone) and vehicle control was diluted in filter sterilized 0.1% BSA in HBSS solution and used  
426 for the serial dilution. WNTs were kept on ice when handled. DKK1 was mixed with the WNT  
427 solution before stimulation. For experiments with inactivated WNT-3A, the WNT-3A dilution and  
428 the corresponding vehicle control were subjected to a heat-freeze cycle (1 h at 65 °C and 1 h at -  
429 20 °C) twice before usage in the experiments. Digitonin was purchased from Sigma (#D141),  
430 dissolved at 10 mg/ml in DMSO and stored at -20 °C.

## 431 **BRET**

432 For all BRET experiments, 2% of Nluc plasmid was used if nothing else was stated. In the BRET  
433 titration experiments, up to 75% of Venus plasmid was used and for Venus-DVL2 and Venus-  
434 DVL2-M2/M4 a minimum of 1.7% and for DEP-Venus 0.1% plasmid was used, as well as one  
435 condition without Venus plasmid resulting in a total of 8 conditions. In the stimulation  
436 experiments, 50% of Venus plasmid was used. 100  $\mu$ l of cells were seeded into poly-D-lysine  
437 (PDL)-coated white 96-well plates with flat bottom (Greiner BioOne). 22-26h post transfection,  
438 cells were washed once with 200  $\mu$ l of HBSS and then kept in HBSS. In the titration experiments,  
439 Venus fluorescence was measured first and subsequently 10  $\mu$ l of Coelenterazine h (Biosynth C-  
440 7004) (2.5  $\mu$ M final concentration) were added yielding a final volume of 100  $\mu$ l. 5 min after  
441 addition, luminescence was read 3 times. In the stimulation experiments, Venus fluorescence was  
442 first measured and subsequently 10  $\mu$ l of Furimazine (Promega) (final dilution of 1:1000) were  
443 added to a final volume of 90  $\mu$ l and 5 min after addition luminescence was read 3 times.  
444 Subsequently, 10  $\mu$ l of ligand were added to a final volume of 100  $\mu$ l and luminescence reading  
445 was continued 28 times for a total of 62 min. All measurements were performed at 37 °C.  
446 Fluorescence was measured using a ClarioStar (BMG) plate reader (497-15 excitation and 540-20  
447 emission). The BRET ratio was determined as the ratio of light emitted by Venus (acceptor) and  
448 light emitted by Nluc (donor). Net BRET was calculated by subtracting the donor only  
449 (transfection without Venus) BRET ratio.  $\Delta$ BRET was calculated as the difference between vehicle  
450 and WNT-treated wells, where each well was normalized to the mean value of the first three reads.  
451 The BRET emission signal was measured using a ClarioStar (BMG) plate reader with bandpass  
452 filters 535-30 nm (acceptor) and 475-30 nm (donor). For experiments with inactivated WNT-3A,  
453 cells were transfected with 1% of FZD<sub>5</sub>-Nluc plasmid and 50% of Venus plasmid (DEP-Venus or  
454 Venus-DVL2). Experiments were run two days after transfection following the protocol described

455 above using a TECAN Spark multimode reader. Emission intensity of the donor (Nluc) was  
456 detected with a 445-470 nm bandpass filter and the acceptor emission intensity (Venus) with a  
457 520-545 nm bandpass filter. An integration time of 0.1 s was applied for recording of both  
458 emissions. In the bystander BRET experiments, 78% of Venus-KRas was used together with 20%  
459 of HA-FZD<sub>5</sub>. 24h post-transfection, the cells were washed with HBSS and kept in this buffer with  
460 1:1000 furimazine. Basal BRET (460-500 nm, 520-560 nm; 0.2 s integration time) was measured  
461 three times on TECAN Spark. Subsequently, vehicle or WNT-3A or WNT-5A (at a final  
462 concentration of 1000 ng/ml) were added and BRET was measured for 60 min (47 cycles). In the  
463 experiments with digitonin, this detergent (10 µg/ml final concentration) or vehicle were added  
464 and BRET was sampled 24 times during 30 min using TECAN Spark.

#### 465 **ELISA surface expression**

466 For quantification of cell surface expression of the different receptor constructs, cells were  
467 transfected with 50% of the indicated receptor plasmid. 100 µl of cell suspension were seeded onto  
468 a transparent PDL-coated 96-well cell culture plate with solid flat bottom. 24 h later the medium  
469 was dispensed from the wells. Cells were washed once with 200 µl of ice-cold wash buffer (0.5%  
470 BSA in PBS), and incubated on ice with 25 µl of primary antibody solution (1% BSA in PBS with  
471 either anti-HA 1:500 (Abcam ab9110) or anti-FLAG 1:500 (Sigma-Aldrich F1804)) for 1h.  
472 Subsequently, cells were washed as described above four times and then incubated on ice with 50  
473 µl of secondary antibody solution (1% BSA in PBS with either HRP-conjugated anti-mouse  
474 1:5000 (Invitrogen 31430) or anti-rabbit 1:5000 (Invitrogen 31460)) for 1 h, after which cells were  
475 washed four times. Lastly, 50 µl of TMB solution (3,3',5,5'-Tetramethylbenzidine, Sigma T0440)  
476 were added to each well and incubated for 20 min after which 50 µl of 2M HCl were added and

477 incubated for an additional 20 min. Absorbance (450 nm) was read with a POLARstar Omega  
478 plate reader (BMG).

#### 479 **TCF/LEF luciferase reporter assay (TOPFlash)**

480  $\Delta$ FZD<sub>1-10</sub> cells were transfected in suspension with 2% FZD<sub>5</sub>-Nluc, 25% M50 Super 8xTOPFlash  
481 (Addgene #12456) and 5% pRL-TK Luc (Promega E2241) plasmid and 100  $\mu$ L of the transfected  
482 cell suspension were seeded into a white PDL-coated 96-well flat bottom plate (Nunc). 24 h after  
483 transfection, cells were washed once with 200  $\mu$ l dPBS and medium was changed to DMEM  
484 without FBS containing either vehicle control, 300 ng/ml of WNT-3A or 300 ng/ml of WNT-3A  
485 together with 300 ng/ml of DKK1. 24 h post stimulation, cells were washed once with 200  $\mu$ l of  
486 dPBS and subsequently analyzed using a Dual-Luciferase Reporter Assay System kit (Promega  
487 E1910) according to the manufacturer's instructions with the following modifications: 20  $\mu$ l of  
488 passive lysis buffer, 20  $\mu$ l of LARII and 20  $\mu$ l of Stop & Glo reagent were used. The luminescence  
489 was measured using a CLARIOstar microplate reader (BMG) (Firefly and Renilla were measured  
490 at  $580 \pm 40$  nm and  $480 \pm 40$  nm, respectively).

#### 491 **Data analysis and statistics**

492 All data were analyzed with GraphPad Prism 8 (San Diego, CA, US). Data points for the titration  
493 experiments represent mean  $\pm$  SD. Data points for the kinetic experiments, concentration  
494 response curves and TOPFlash represent mean  $\pm$  SEM. Concentration response curves were  
495 plotted as the response 30 min after stimulation from each concentration of the kinetic  
496 experiments. The concentration response curves were fit using a non-linear three parameters  
497 model selected based upon an extra sum-of-squares F test in comparison to a four parameters  
498 model ( $P < 0.05$ ). For non-saturating concentration response curves, caution should be taken

499 when interpretating the EC<sub>50</sub> values, which are provided, when the software (GraphPad Prism 8)  
500 allowed their definition. The TOPFlash statistical test was done using one-way ANOVA with  
501 Dunnett's post hoc analysis. The statistical differences for the surface expression and basal  
502 recruitment of DVL2 in the bystander BRET assays were tested with paired Student's t-test (\*\* P  
503 < 0.01, \*\*\* P < 0.001). WNT-induced kinetics were analyzed with a plateau followed by one  
504 phase association equation, data points represent mean ± SD. Individual rate constants from each  
505 experiment were compared with a two-way ANOVA with Fisher's least significant difference  
506 post hoc analysis.  
507

## 508 **Supplementary Materials**

509 Supplementary Materials and Methods

510 Fig. S1. Validation of the FZD<sub>5</sub>-DVL2 BRET approach.

511 Fig. S2. Kinetic analysis of the WNT-induced conformational dynamics of FZD<sub>5</sub>-DVL2  
512 interaction.

513 Fig. S3. WNT-induced FZD<sub>5</sub>-DVL2 conformational dynamics is independent from LRP5/6.

514 Fig. S4. Validation of the direct FZD<sub>5</sub>-DEP BRET approach.

515 Fig. S5. Kinetic analysis of WNT-induced conformational dynamics of FZD<sub>5</sub>-DEP interaction.

516

## 517 **References and Notes:**

518 1. G. Schulte, International Union of Basic and Clinical Pharmacology. LXXX. The class  
519 frizzled receptors. *Pharmacological Reviews* (2010), , doi:10.1124/pr.110.002931.

520 2. K. Willert, R. Nusse, Wnt Proteins. *Cold Spring Harbor Perspectives in Biology*. **4**  
521 (2012), doi:10.1101/cshperspect.a007864.

522 3. H. Schihada, M. Kowalski-Jahn, A. Turku, G. Schulte, Deconvolution of WNT-induced  
523 Frizzled conformational dynamics with fluorescent biosensors. *Biosensors and*  
524 *Bioelectronics*. **177** (2021), doi:10.1016/j.bios.2020.112948.

525 4. G. Schulte, S. C. Wright, Frizzleds as GPCRs – More Conventional Than We Thought!  
526 *Trends in Pharmacological Sciences*. **39**, 828–842 (2018).

527 5. C. Gao, Y. G. Chen, Dishevelled: The hub of Wnt signaling. *Cellular Signalling*. **22**, 717–  
528 727 (2010).



- 529 6. M. Sharma, I. Castro-Piedras, G. E. Simmons, K. Pruitt, Dishevelled: A masterful  
530 conductor of complex Wnt signals. *Cellular Signalling*. **47** (2018),  
531 doi:10.1016/j.cellsig.2018.03.004.
- 532 7. M. Micka, V. Bryja, in *Pharmacology of the WNT Signaling System. Handbook of*  
533 *Experimental Pharmacology*, G. Schulte, P. Kozielwicz, Eds. (2021), vol. 269, pp. 117–  
534 135.
- 535 8. T. Schwarz-Romond, M. Fiedler, N. Shibata, P. J. G. Butler, A. Kikuchi, Y. Higuchi, M.  
536 Bienz, The DIX domain of Dishevelled confers Wnt signaling by dynamic  
537 polymerization. *Nature Structural and Molecular Biology*. **14** (2007),  
538 doi:10.1038/nsmb1247.
- 539 9. V. Bryja, G. Schulte, N. Rawal, A. Grahn, E. Arenas, Wnt-5a induces dishevelled  
540 phosphorylation and dopaminergic differentiation via a CK1-dependent mechanism.  
541 *Journal of Cell Science*. **120**, 586–595 (2007).
- 542 10. M. Umbhauer, The C-terminal cytoplasmic Lys-Thr-X-X-X-Trp motif in frizzled  
543 receptors mediates Wnt/beta-catenin signalling. *The EMBO Journal*. **19** (2000),  
544 doi:10.1093/emboj/19.18.4944.
- 545 11. M. v. Gammons, M. Renko, C. M. Johnson, T. J. Rutherford, M. Bienz, Wnt Signalosome  
546 Assembly by DEP Domain Swapping of Dishevelled. *Molecular Cell*. **64**, 92–104 (2016).
- 547 12. D. V. F. Tauriello, I. Jordens, K. Kirchner, J. W. Slootstra, T. Kruitwagen, B. A. M.  
548 Bouwman, M. Noutsou, S. G. D. Rüdiger, K. Schwamborn, A. Schambony, M. M.  
549 Maurice, Wnt/ $\beta$ -catenin signaling requires interaction of the Dishevelled DEP domain and

- 550 C terminus with a discontinuous motif in Frizzled. *Proceedings of the National Academy*  
551 *of Sciences of the United States of America*. **109** (2012), doi:10.1073/pnas.1114802109.
- 552 13. M. v. Gammons, T. J. Rutherford, Z. Steinhart, S. Angers, M. Bienz, Essential role of the  
553 Dishevelled DEP domain in a Wnt-dependent human-cell-based complementation assay.  
554 *Journal of Cell Science*. **129**, 3892–3902 (2016).
- 555 14. K. Hanáková, O. Bernatík, M. Kravec, M. Micka, J. Kumar, J. Harnoš, P. Ovesná, P.  
556 Paclíková, M. Rádsetoulal, D. Potěšil, K. Tripsianes, L. Čajánek, Z. Zdráhal, V. Bryja,  
557 Comparative phosphorylation map of Dishevelled 3 links phospho-signatures to biological  
558 outputs. *Cell Communication and Signaling*. **17** (2019), doi:10.1186/s12964-019-0470-z.
- 559 15. H. Strutt, M. A. Price, D. Strutt, Planar Polarity Is Positively Regulated by Casein Kinase  
560 Iε in *Drosophila*. *Current Biology*. **16** (2006), doi:10.1016/j.cub.2006.04.041.
- 561 16. J. D. Axelrod, J. R. Miller, J. M. Shulman, R. T. Moon, N. Perrimon, Differential  
562 recruitment of dishevelled provides signaling specificity in the planar cell polarity and  
563 Wingless signaling pathways. *Genes and Development*. **12**, 2610–2622 (1998).
- 564 17. J. Valnohova, M. Kowalski-Jahn, R. K. Sunahara, G. Schulte, Functional dissection of the  
565 N-terminal extracellular domains of Frizzled 6 reveals their roles for receptor localization  
566 and Dishevelled recruitment. *Journal of Biological Chemistry*. **293**, 17875–17887 (2018).
- 567 18. M. Simons, W. J. Gault, D. Gotthardt, R. Rohatgi, T. J. Klein, Y. Shao, H. J. Lee, A. L.  
568 Wu, Y. Fang, L. M. Satlin, J. T. Dow, J. Chen, J. Zheng, M. Boutros, M. Mlodzik,  
569 Electrochemical cues regulate assembly of the Frizzled/Dishevelled complex at the plasma  
570 membrane during planar epithelial polarization. *Nature Cell Biology*. **11** (2009),  
571 doi:10.1038/ncb1836.

- 572 19. W. Ma, M. Chen, H. Kang, Z. Steinhart, S. Angers, X. He, M. W. Kirschner, Single-  
573 molecule dynamics of Dishevelled at the plasma membrane and Wnt pathway activation.  
574 *Proceedings of the National Academy of Sciences*. **117** (2020),  
575 doi:10.1073/pnas.1910547117.
- 576 20. I. Bang, H. R. Kim, A. H. Beaven, J. Kim, S. B. Ko, G. R. Lee, H. Lee, W. Im, C. Seok,  
577 K. Y. Chung, H. J. Choi, Biophysical and functional characterization of norrin signaling  
578 through Frizzled4. *Proceedings of the National Academy of Sciences of the United States*  
579 *of America*. **115**, 8787–8792 (2018).
- 580 21. P. Kozielowicz, A. Turku, C. F. Bowin, J. Petersen, J. Valnohova, M. C. A. Cañizal, Y.  
581 Ono, A. Inoue, C. Hoffmann, G. Schulte, Structural insight into small molecule action on  
582 Frizzleds. *Nature Communications*. **11** (2020), doi:10.1038/s41467-019-14149-3.
- 583 22. A. de Lean, J. M. Stadel, R. J. Lefkowitz, A ternary complex model explains the agonist-  
584 specific binding properties of the adenylate cyclase-coupled  $\beta$ -adrenergic receptor.  
585 *Journal of Biological Chemistry*. **255** (1980), doi:10.1016/s0021-9258(20)79672-9.
- 586 23. S. C. Wright, P. Kozielowicz, M. Kowalski-Jahn, J. Petersen, C. F. Bowin, G.  
587 Slodkowicz, M. Marti-Solano, D. Rodríguez, B. Hot, N. Okashah, K. Strakova, J.  
588 Valnohova, M. M. Babu, N. A. Lambert, J. Carlsson, G. Schulte, A conserved molecular  
589 switch in Class F receptors regulates receptor activation and pathway selection. *Nature*  
590 *Communications*. **10** (2019), doi:10.1038/s41467-019-08630-2.
- 591 24. B. Szalai, P. Hoffmann, S. Prokop, L. Erdélyi, P. Várnai, L. Hunyady, Improved  
592 methodical approach for quantitative BRET analysis of G protein coupled receptor  
593 dimerization. *PLoS ONE*. **9** (2014), doi:10.1371/journal.pone.0109503.

- 594 25. T. H. Lan, Q. Liu, C. Li, G. Wu, J. Steyaert, N. A. Lambert, BRET evidence that  $\beta$ 2  
595 adrenergic receptors do not oligomerize in cells. *Scientific Reports*. **5** (2015),  
596 doi:10.1038/srep10166.
- 597 26. K. D. Proffitt, B. Madan, Z. Ke, V. Pendharkar, L. Ding, M. A. Lee, R. N. Hannoush, D.  
598 M. Virshup, Pharmacological Inhibition of the Wnt Acyltransferase PORCN Prevents  
599 Growth of WNT-Driven Mammary Cancer. *Cancer Research*. **73**, 502–507 (2013).
- 600 27. A. Turku, H. Schihada, P. Kozielowicz, C.-F. Bowin, G. Schulte, Residue 6.43 defines  
601 receptor function in class F GPCRs. *Nature Communications*. **12** (2021),  
602 doi:10.1038/s41467-021-24004-z.
- 603 28. S. Kishida, H. Yamamoto, S. Hino, S. Ikeda, M. Kishida, A. Kikuchi, DIX Domains of  
604 Dvl and Axin Are Necessary for Protein Interactions and Their Ability To Regulate  $\beta$ -  
605 Catenin Stability. *Molecular and Cellular Biology*. **19**, 4414–4422 (1999).
- 606 29. F. Cong, L. Schweizer, H. Varmus, Wnt signals across the plasma membrane to activate  
607 the  $\beta$ -catenin pathway by forming oligomers containing its receptors, Frizzled and LRP.  
608 *Development*. **131**, 5103–5115 (2004).
- 609 30. Z. J. DeBruine, H. E. Xu, K. Melcher, Assembly and architecture of the Wnt/ $\beta$ -catenin  
610 signalosome at the membrane. *British Journal of Pharmacology*. **174**, 4564–4574 (2017).
- 611 31. J. Bilić, Y. L. Huang, G. Davidson, T. Zimmermann, C. M. Cruciat, M. Bienz, C. Niehrs,  
612 Wnt induces LRP6 signalosomes and promotes dishevelled-dependent LRP6  
613 phosphorylation. *Science*. **316** (2007), doi:10.1126/science.1137065.
- 614 32. V. Bryja, E. R. Andersson, A. Schambony, M. Esner, L. Bryjová, K. K. Bins, A. C. Hall,  
615 B. Kraft, L. Cajanek, T. P. Yamaguchi, M. Buckingham, E. Arenas, The extracellular

- 616 domain of Lrp5/6 inhibits noncanonical Wnt signaling in vivo. *Molecular Biology of the*  
617 *Cell*. **20** (2009), doi:10.1091/mbc.E08-07-0711.
- 618 33. J. Bao, J. J. Zheng, D. Wu, The structural basis of DKK-mediated inhibition of Wnt/LRP  
619 signaling. *Science Signaling*. **5** (2012), , doi:10.1126/scisignal.2003028.
- 620 34. V. E. Ahn, M. L. H. Chu, H. J. Choi, D. Tran, A. Abo, W. I. Weis, Structural basis of Wnt  
621 signaling inhibition by Dickkopf binding to LRP5/6. *Developmental Cell*. **21** (2011),  
622 doi:10.1016/j.devcel.2011.09.003.
- 623 35. W. Kan, M. D. Enos, E. Korkmazhan, S. Muennich, D. H. Chen, M. v. Gammons, M.  
624 Vasishtha, M. Bienz, A. R. Dunn, G. Skiniotis, W. I. Weis, Limited dishevelled/axin  
625 oligomerization determines efficiency of wnt/b-catenin signal transduction. *eLife*. **9**  
626 (2020), doi:10.7554/eLife.55015.
- 627 36. F. Weihs, J. Wang, K. D. G. Pflieger, H. Dacres, Experimental determination of the  
628 bioluminescence resonance energy transfer (BRET) Förster distances of NanoBRET and  
629 red-shifted BRET pairs. *Analytica Chimica Acta: X*. **6** (2020),  
630 doi:10.1016/j.acax.2020.100059.
- 631 37. L. Ye, N. van Eps, M. Zimmer, O. P. Ernst, R. Scott Prosser, Activation of the A<sub>2A</sub>  
632 adenosine G-protein-coupled receptor by conformational selection. *Nature*. **533** (2016),  
633 doi:10.1038/nature17668.
- 634 38. W. I. Weis, B. K. Kobilka, The Molecular Basis of G Protein-Coupled Receptor  
635 Activation. *Annual Review of Biochemistry*. **87** (2018), , doi:10.1146/annurev-biochem-  
636 060614-033910.

- 637 39. S. C. Wright, M. C. A. Cañizal, T. Benkel, K. Simon, C. le Gouill, P. Matricon, Y.  
638 Namkung, V. Lukasheva, G. M. König, S. A. Laporte, J. Carlsson, E. Kostenis, M.  
639 Bouvier, G. Schulte, C. Hoffmann, FZD<sub>5</sub> is a Gα<sub>q</sub>-coupled receptor that exhibits the  
640 functional hallmarks of prototypical GPCRs. *Science Signaling*. **11** (2018),  
641 doi:10.1126/scisignal.aar5536.
- 642 40. O. Bernatík, K. Šedová, C. Schille, R. S. Ganji, I. Červenka, L. Trantírek, A. Schambony,  
643 Z. Zdráhal, V. Bryja, Functional Analysis of Dishevelled-3 Phosphorylation Identifies  
644 Distinct Mechanisms Driven by Casein Kinase 1ε and Frizzled5. *Journal of Biological*  
645 *Chemistry*. **289**, 23520–23533 (2014).
- 646 41. P. Kozielowicz, A. Turku, G. Schulte, *Molecular Pharmacology*, in press,  
647 doi:10.1124/mol.119.117986.
- 648 42. M. Kowalski-Jahn, H. Schihada, A. Turku, T. Huber, T. P. Sakmar, G. Schulte, Frizzled  
649 BRET sensors based on bioorthogonal labeling of unnatural amino acids reveal WNT-  
650 induced dynamics of the cysteine-rich domain. *Science Advances*. **7** (2021),  
651 doi:10.1126/sciadv.abj7917.
- 652 43. M. Eubelen, N. Bostaille, P. Cabochette, A. Gauquier, P. Tebabi, A. C. Dumitru, M.  
653 Koehler, P. Gut, D. Alsteens, D. Y. R. Stainier, A. Garcia-Pino, B. Vanhollebeke, A  
654 molecular mechanism for Wnt ligand-specific signaling. *Science*. **361** (2018),  
655 doi:10.1126/science.aat1178.
- 656 44. O. Bernatik, P. Paclikova, A. Kotrbova, V. Bryja, L. Cajanek, Primary Cilia Formation  
657 Does Not Rely on WNT/β-Catenin Signaling. *Frontiers in Cell and Developmental*  
658 *Biology*. **9** (2021), doi:10.3389/fcell.2021.623753.

659

660 **Acknowledgments:**

661 Thank you to Anna Krook for access to the CLARIOstar plate reader, to Benoit Vanhollenbeke  
662 for the  $\Delta$ FZD<sub>1-10</sub> HEK293T cells, to Nevin A. Lambert for assistance with gBlock design,  
663 Vitezslav Bryja for the  $\Delta$ LRP5/6 HEK293 T-rex cells and Mariann Bienz for the  $\Delta$ DVL1-3  
664 HEK293 T cells. Figure illustrations were created with BioRender.com.

665

666 **Funding:** This work was supported by grants from:

667 Karolinska Institutet

668 Robert Lundbergs minnesstiftelse (2020-01167)

669 Swedish Research Council (2019-01190)

670 Swedish Cancer Society (20 1102 PjF, 20 0264P, CAN2017/561)

671 Novo Nordisk Foundation (NNF21OC0070008, NNF20OC0063168, NNF19OC0056122)

672 The Lars Hierta Memorial Foundation (FO2019-0086, FO2020-0304)

673 The Alex and Eva Wallström Foundation for Scientific Research and Education (2020-00228)

674 The Swedish Society of Medical Research (P19-0055)

675 The Deutsche Forschungsgemeinschaft (DFG, German Research Foundation; 427840891)

676

677 **Author contributions:**

678 Conceptualization: CFB, GS

679 Methodology: CFB

680 Investigation: CFB, PK, LG, MKJ, HS

681 Visualization: CFB

682 Funding acquisition: CFB, PK, GS

683 Project administration: CFB, GS

684 Supervision: GS

685 Writing – original draft: CFB, GS

686 Writing – review & editing: CFB, GS, PK, LG

687

688 **Competing interests:** The authors declare no competing interests.

689

690 **Data and materials availability:** All data are available in the main text or the supplementary

691 materials.

692



Figure 1

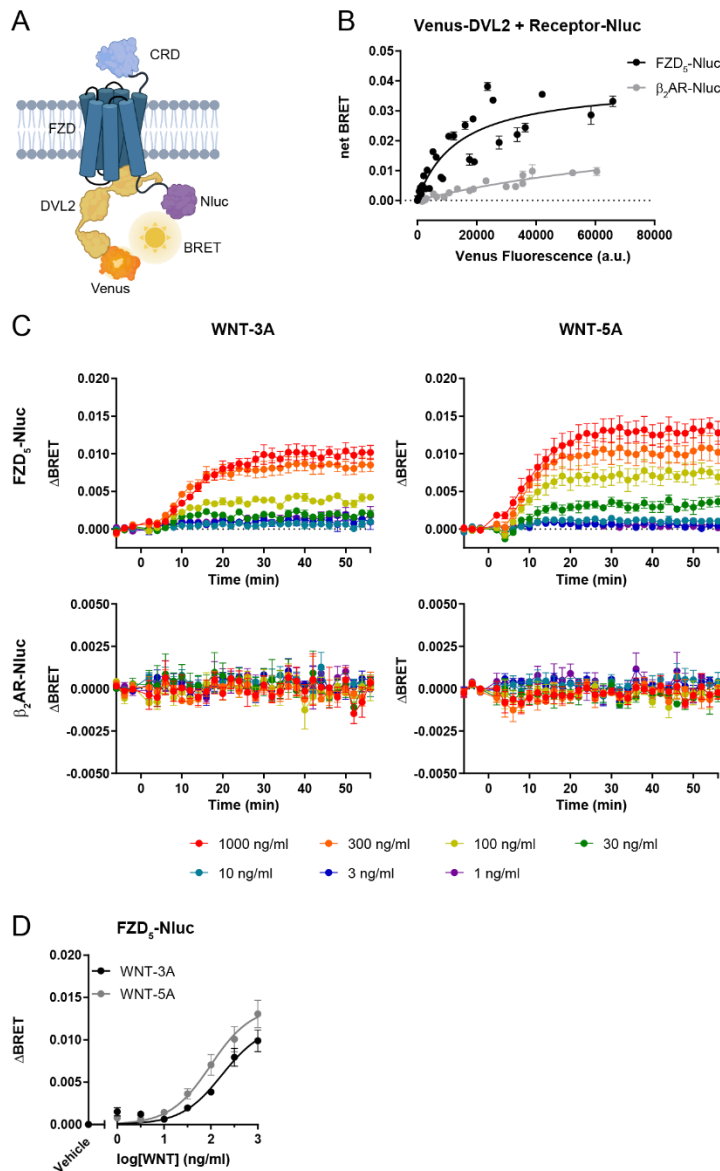

693

694 **Fig. 1. Venus-DVL2 is recruited to FZD<sub>5</sub>-Nluc and WNT stimulation induces FZD-DVL**

695 **dynamics. (A)** Schematic of the Venus-DVL2 and FZD<sub>5</sub>-Nluc BRET assay setup. DVL2 in

696 yellow, Venus fused to the DVL2 N-terminal in orange and Nluc fused to the FZD<sub>5</sub> C-terminus in

697 purple. The scheme was prepared with the web-based tool BioRender.com. **(B)** Venus-DVL2 was

698 titrated with a fixed amount of Nluc-tagged FZD<sub>5</sub> in ΔFZD<sub>1-10</sub> cells to assess WNT-independent,

699 basal recruitment of DVL2 to FZD<sub>5</sub>; β<sub>2</sub>AR was used as negative control. net BRET is presented

700 as mean  $\pm$  SD of 3-5 independent experiments. **(C)** Fixed amounts of Venus-DVL2 and Nluc-  
701 tagged FZD<sub>5</sub> (Venus:Nluc ratio 25:1) were transfected into  $\Delta$ FZD<sub>1-10</sub> cells to assess the change in  
702 FZD-DVL dynamics upon WNT stimulation. The kinetic BRET response between Venus-DVL2  
703 and Nluc-FZD<sub>5</sub> was monitored with WNT-3A or WNT-5A stimulation of FZD<sub>5</sub> or the negative  
704 control  $\beta_2$ AR. **(D)** Concentration response curve for WNT stimulation of FZD<sub>5</sub>-transfected cells  
705 based on BRET values 30 min after stimulation.  $\Delta$ BRET values are presented as mean  $\pm$  SEM of  
706 3-7 independent experiments.

707

Figure 2

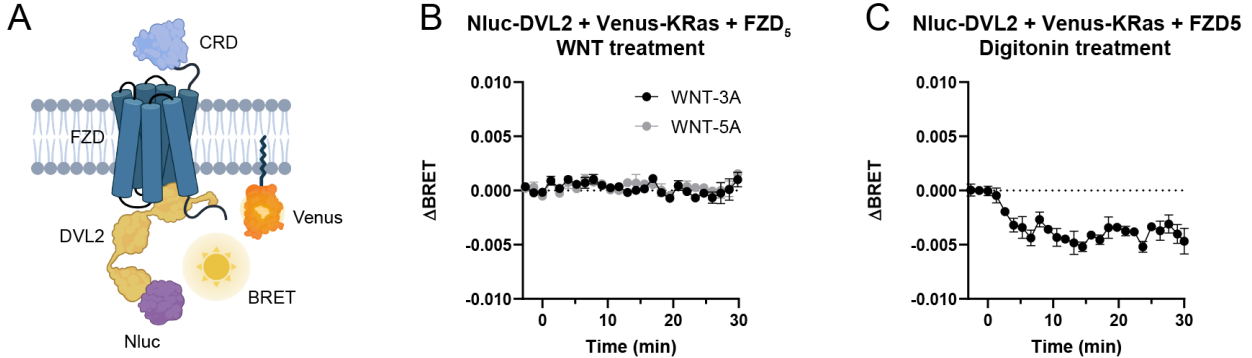

708

709 **Fig. 2. Bystander BRET monitoring FZD<sub>5</sub>-induced DVL recruitment to the membrane**

710 **supports WNT-induced conformational over recruitment dynamics.** (A) Schematic of the

711 Nluc-DVL2 and Venus-KRas bystander BRET assay. Membrane-anchored Venus-KRas in

712 yellow, Nluc fused to the DVL2 N-terminal in orange. The scheme was prepared with the web-

713 based tool BioRender.com. The plasma membrane recruitment bystander BRET between Nluc-

714 DVL2 and Venus-KRas was measured in response to either (B) 1 μg/ml of WNT-3A or WNT-5A

715 and (C) 10 μg/ml of digitonin. Data show mean ± SEM of three independent experiments.

716

717

Figure 3

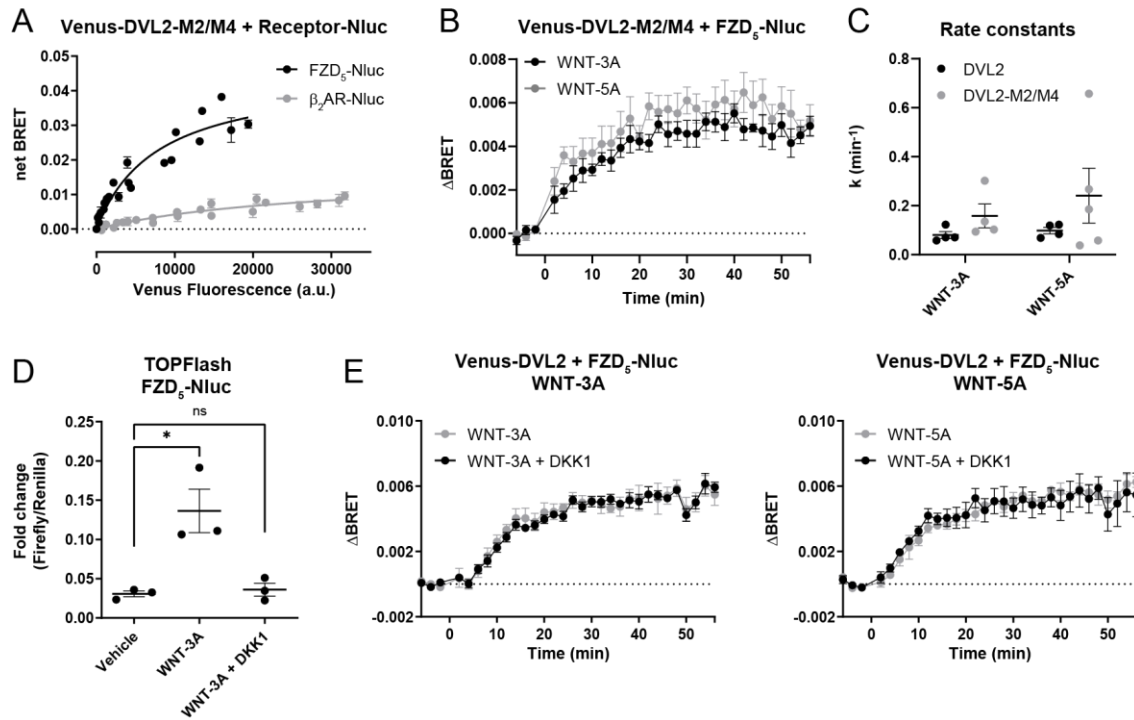

718

719

720 **Fig. 3. FZD-DVL dynamics can be separated from DVL-oligomerization and signalosome**

721 **formation.** (A) Venus-DVL2-M2/M4 was titrated with a fixed amount of FZD<sub>5</sub>-Nluc in  $\Delta$ FZD<sub>1-10</sub>

722 <sub>10</sub> cells to assess basal recruitment of oligomerization-impaired DVL2;  $\beta_2$ AR was used as negative

723 control. (B) The kinetic BRET response between Venus-DVL2-M2/M4 and FZD<sub>5</sub>-Nluc

724 (Venus:Nluc ratio 25:1) upon 1  $\mu$ g/ml of WNT-3A or WNT-5A stimulation was monitored. Data

725 show mean  $\pm$  SEM of 4-5 independent experiments. (C) Comparison of Venus-DVL2 and Venus-

726 DVL2-M2/M4 rate constants  $k$  upon WNT stimulation. No statistically significant differences

727 were found between DVL2 and DVL2-M2/M4 (two-way ANOVA with Fisher's LSD post hoc

728 analysis). Data presented in (C) are extracted from the curve fitting presented in Fig. S2A-B. (D)

729 The bar graph depicts the TOPFlash response in  $\Delta$ FZD<sub>1-10</sub> cells transfected with FZD<sub>5</sub>-Nluc after

730 24 h of stimulation with either vehicle or 300 ng/ml of WNT-3A in the absence of presence of 300  
731 ng/ml of DKK1. Data are presented as mean  $\pm$  SEM of 3 independent experiments (\*  $P < 0.05$ , ns  
732 = not significant, one-way ANOVA with Dunnett's post hoc analysis). (E) The kinetic BRET  
733 response between Venus-DVL2 and FZD<sub>5</sub>-Nluc (Venus:Nluc ratio 25:1) was monitored in  $\Delta$ FZD<sub>1</sub>-  
734 <sub>10</sub> cells during stimulation with 300 ng/ml of either WNT-3A or WNT-5A in the absence or  
735 presence of 300 ng/ml of DKK1.  $\Delta$ BRET is presented as mean  $\pm$  SEM of 4 independent  
736 experiments.  
737

Figure 4

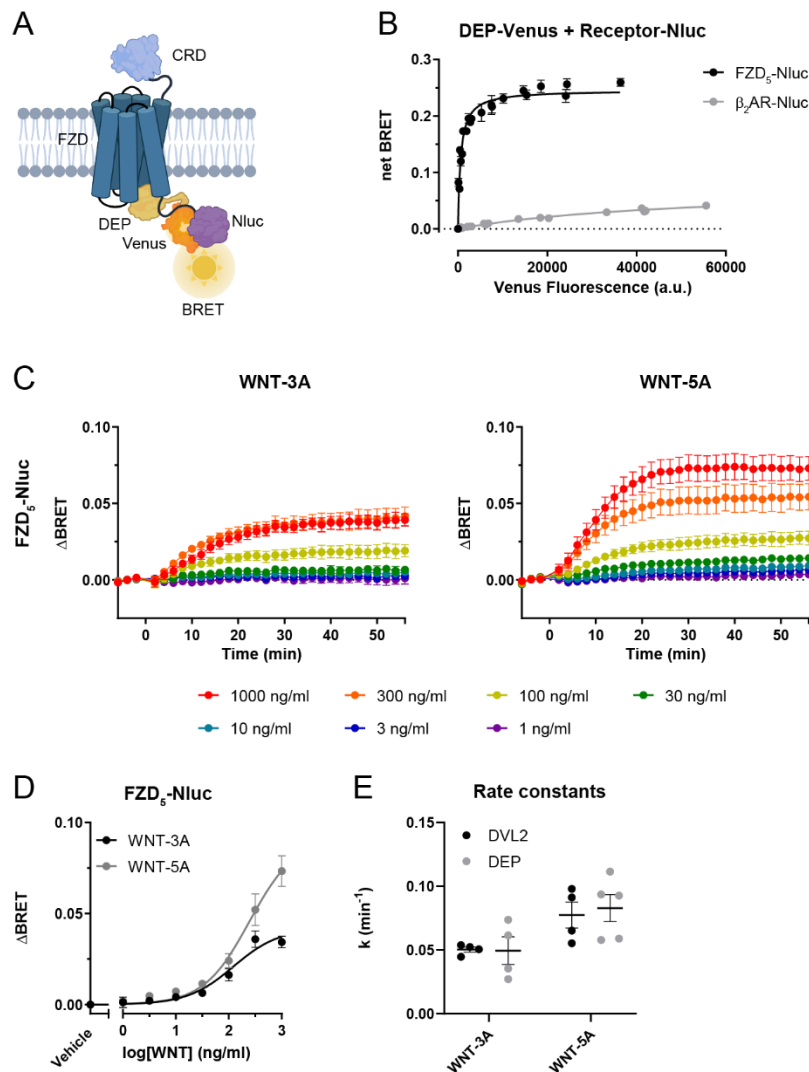

738

739 **Fig. 4. DEP-Venus is a conformational sensor for an active FZD<sub>5</sub>.** (A) Schematic presentation  
740 of the DEP-Venus and FZD<sub>5</sub>-Nluc BRET assay setup. DEP in yellow, Venus fused to the DEP C-  
741 terminus in orange and Nluc fused to the FZD<sub>5</sub> C-terminus in purple. The scheme was prepared  
742 with the web-based tool BioRender.com. (B) DEP-Venus was titrated with a fixed amount of  
743 FZD<sub>5</sub>-Nluc in ΔFZD<sub>1-10</sub> cells to assess basal recruitment to FZD<sub>5</sub>; β<sub>2</sub>AR was used as a negative  
744 control. (C) The kinetic BRET response was monitored between DEP-Venus and FZD<sub>5</sub>-Nluc  
745 (Venus:Nluc ratio 25:1) in ΔFZD<sub>1-10</sub> cells during WNT-3A or WNT-5A stimulation. Data show

746 mean  $\pm$  SEM of 3 independent experiments. **(D)** Concentration response curve for FZD<sub>5</sub>-mediated  
747 effects is based on data obtained 30 min after stimulation.  $\Delta$ BRET is presented as mean  $\pm$  SEM of  
748 3 independent experiments. **(E)** Comparison of Venus-DVL2 and DEP-Venus rate constants  $k$   
749 upon WNT stimulation. No statistical differences were found between DVL2 and DEP (two-way  
750 ANOVA with Fisher's LSD post hoc analysis). Data presented in (E) are extracted from the curve  
751 fitting presented in Fig. S2A and Fig. S5A.

752

Figure 5

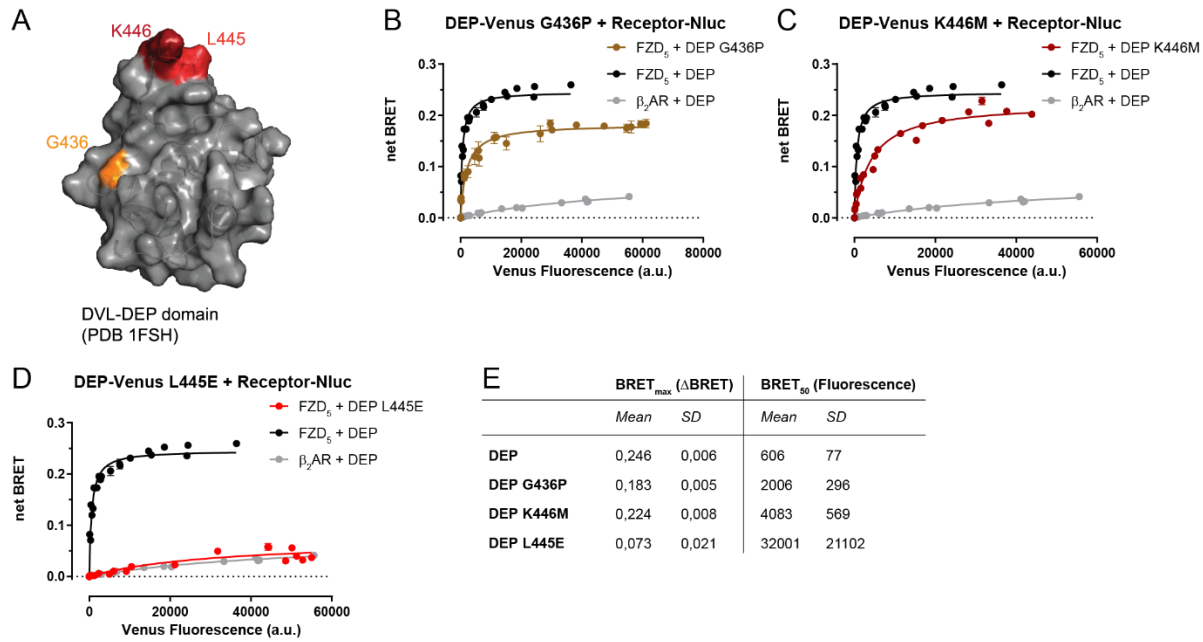

753

754

755 **Fig. 5. Mutations in the DEP domain change FZD<sub>5</sub>-DEP interaction.** (A) The DEP mutations  
 756 G436P, K446M and L445E (numbering for human DVL2) are visualized in a structure of the DEP  
 757 domain of mouse DVL1 (PDB: 1FSH). (B-D) Titration of either DEP-Venus mutant (B) G436P,  
 758 (C), K446M or (D) L445E with a fixed amount of FZD<sub>5</sub>-Nluc in  $\Delta$ FZD<sub>1-10</sub> cells to assess basal  
 759 recruitment;  $\beta_2$ AR was used as negative control (same as in Fig. 4B). Data show mean  $\pm$  SD of  
 760 three independent experiments. (E) Summary of saturation BRET<sub>max</sub> and BRET<sub>50</sub> values of  
 761 wildtype DEP and mutants extracted from fits in Fig. 4B and Fig. 5B-D.

762



Figure 6

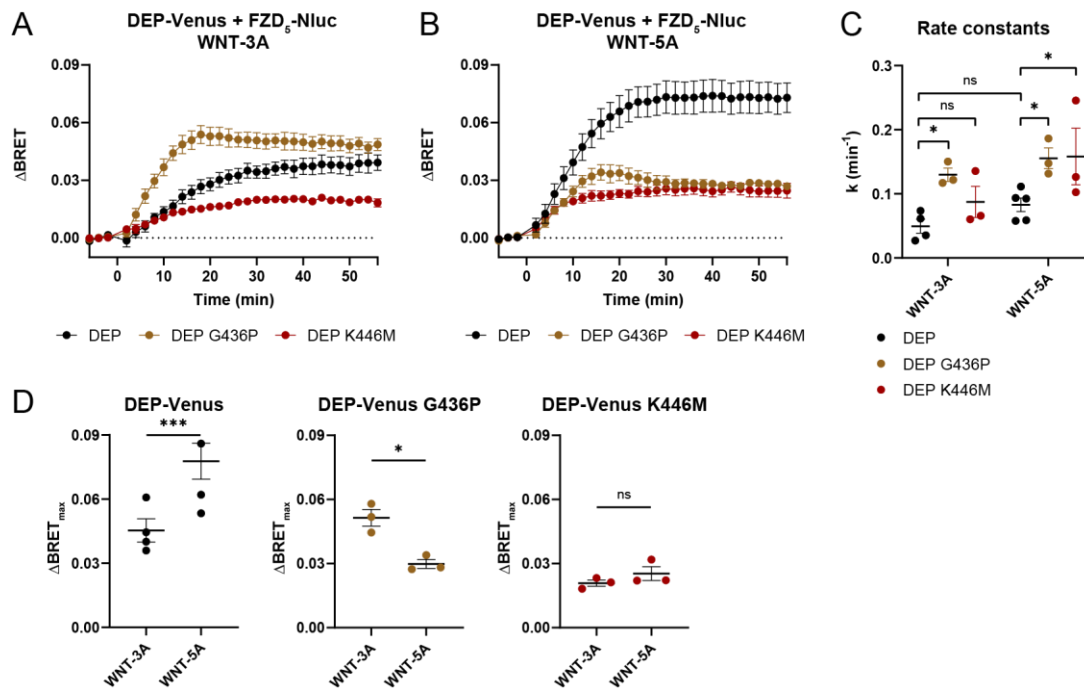

763

764 **Fig. 6. Mutations in the DVL DEP domain affect agonist-induced conformational dynamics**

765 **in the FZD<sub>5</sub>-DEP interplay. (A-B)** The kinetic BRET response was monitored between DEP-

766 Venus G436P or DEP-Venus K446M and FZD<sub>5</sub>-Nluc in  $\Delta$ FZD<sub>1-10</sub> cells during (A) WNT-3A or

767 (B) WNT-5A stimulation. Data show mean  $\pm$  SEM of 3 independent experiments. DEP-Venus

768 data is from Fig. 4B. (C) Comparison of DEP-Venus constructs rate constants  $k$  upon WNT

769 stimulation (significance levels are given as \* P < 0.05 or ns (not significant), two-way ANOVA

770 with Fisher's LSD post hoc analysis). (D)  $\Delta$ BRET<sub>max</sub> values for the different DEP constructs with

771 WNT stimulation. Observe that comparisons of conformational BRET<sub>max</sub> values between mutants

772 are not quantitative provided the different saturation BRET<sub>max</sub> values obtained in acceptor titration

773 experiments shown in Fig. 5E. Data presented in (C) and (D) are extracted from the curve fitting

774 presented in Fig. S5A-C.

775

## **Supplementary Information for**

### **WNT stimulation induced conformational dynamics in the Frizzled-Dishevelled interaction**

**Authors:** Carl-Fredrik Bowin<sup>1</sup>, Pawel Kozielowicz<sup>1</sup>, Lukas Grätz<sup>1</sup>, Maria Kowalski-Jahn<sup>1</sup>, Hannes Schihada<sup>1</sup>, Gunnar Schulte<sup>1\*†</sup>

#### **Affiliations:**

<sup>1</sup>Karolinska Institutet, Dept. Physiology & Pharmacology, Sec. Receptor Biology & Signaling; Stockholm, Sweden.

\*Corresponding author. Email: [gunnar.schulte@ki.se](mailto:gunnar.schulte@ki.se). Phone: +46-8-524 8 7933

†Address: Biomedicum 6D, Solnavägen 9, S-171 65 Stockholm, Sweden

## Supplementary Materials and Methods

### DEP gBlock

TCAGATCTCGAGCTCAAGCTTCGAATTCTGGCCACCATGCTCCAAAACGAGCTTGCCCTTAAACT  
CGCCGGCCTTGATATCAACAAGACTGGTGGATCTGGGTCTGTACACACCGATATGGCAAGCGTA  
ACTAAAGCCATGGCAGCTCCAGAATCAGGCCTCGAGGTACGGGATCGGATGTGGCTTAAGATA  
ACGATTCCAAACGCGTTCCTTGGCTCCGACGTGGTTGACTGGCTCTATCATCATGTAGAAGGTT  
TCCCTGAGAGACGCGAGGCACGCAAGTACGCGAGTGGTCTTCTGAAAGCCGGGCTCATACGG  
CACACGGTGAATAAGATAACATTTAGTGAGCAATGTTACTATGTCTTCGGCGACTTGTCGGGAC  
GGATCCACCGGTCGCC

DEP            HindIII            NES            BamHI

### HA-FZD<sub>5</sub>-Nluc prolonged overlapping extension primers

Vector forward: 5' GAACGCATTCTGGCGTAAGTACCGCCTCCTCGGATG

Vector reverse: 5' ATCTTCGAGTGTGAAGACGACGTGGCTCAGAGACA

Insert forward: 5' TGTCTCTGAGCCACGTCGTCTTCACACTCGAAGATTTCC

Insert reverse: 5' CATCCGAGGAGGCGGTACTTACGCCAGAATGCGTTC

### ΔDEP Venus-DVL2

Vector forward: 5' GGCTGTGAGAGTTACCTAGTTAACCTC

Vector reverse: 5' GAGACCCCGGCCTTCGCA

Figure S1

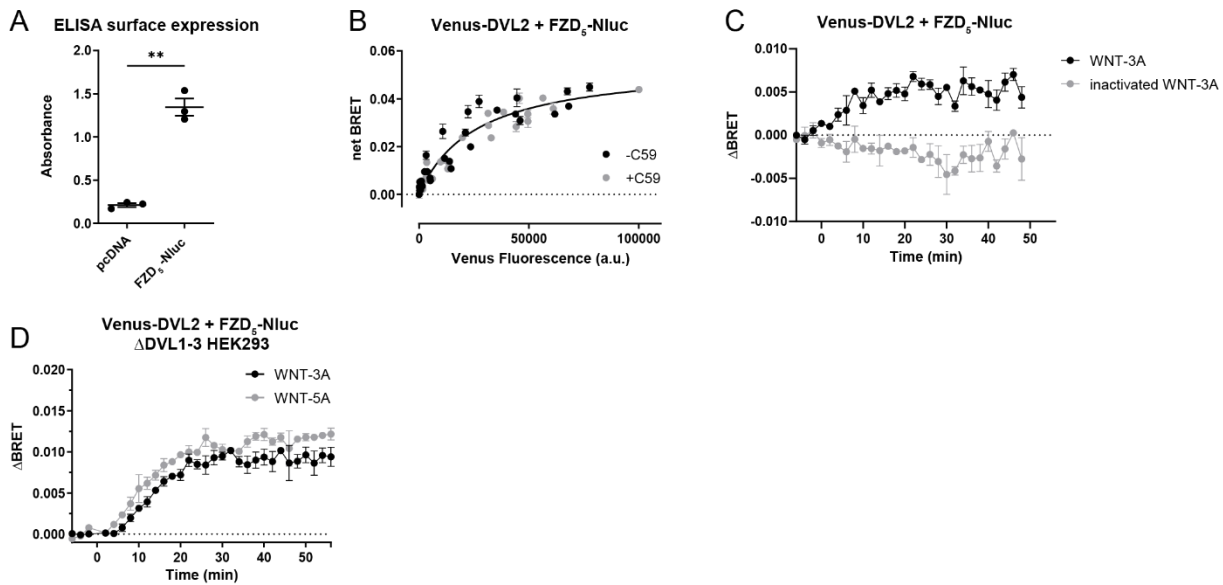

**Fig. S1. Validation of the FZD<sub>5</sub>-DVL2 BRET approach.** (A) ELISA surface expression of HA-FZD<sub>5</sub>-Nluc in comparison to pcDNA. Data are presented as mean  $\pm$  SEM of 3 independent experiments and were analyzed using ratio paired Student's t-test (\*\*  $P < 0.01$ ). (B) Venus-DVL2 was titrated with a fixed amount of Nluc-tagged FZD<sub>5</sub> treated with either vehicle or 10 nM C59 overnight to investigate the dependence of basal recruitment of DVL to FZDs on the secretion of endogenously expressed WNTs. The curve fit was calculated using One-site specific binding comparing fits using extra sum-of-squares F test ( $P < 0.05$ ), and data are presented as mean  $\pm$  SD for 4 independent experiments. (C) The kinetic BRET response was monitored between Venus-DVL2 and FZD<sub>5</sub>-Nluc (Venus:Nluc ratio 50:1) in  $\Delta$ FZD<sub>1-10</sub> cells with stimulation of either WNT-3A (1000 ng/ml) or inactivated WNT-3A (1000 ng/ml). Data are presented as mean  $\pm$  SEM of 3 independent experiments. (D) Fixed amounts of Venus-DVL2 and Nluc-tagged FZD<sub>5</sub> (Venus:Nluc ratio 25:1) were transfected into  $\Delta$ DVL1-3 cells to investigate the potential role of endogenous DVL for the observed FZD<sub>5</sub>-DVL dynamics upon WNT stimulation. The kinetic BRET response between Venus-DVL2 and

FZD<sub>5</sub>-Nluc was monitored with stimulation of either 1000 ng/ml WNT-3A or WNT-5A. Data are presented as mean  $\pm$  SEM of 3 independent experiments.

## Figure S2

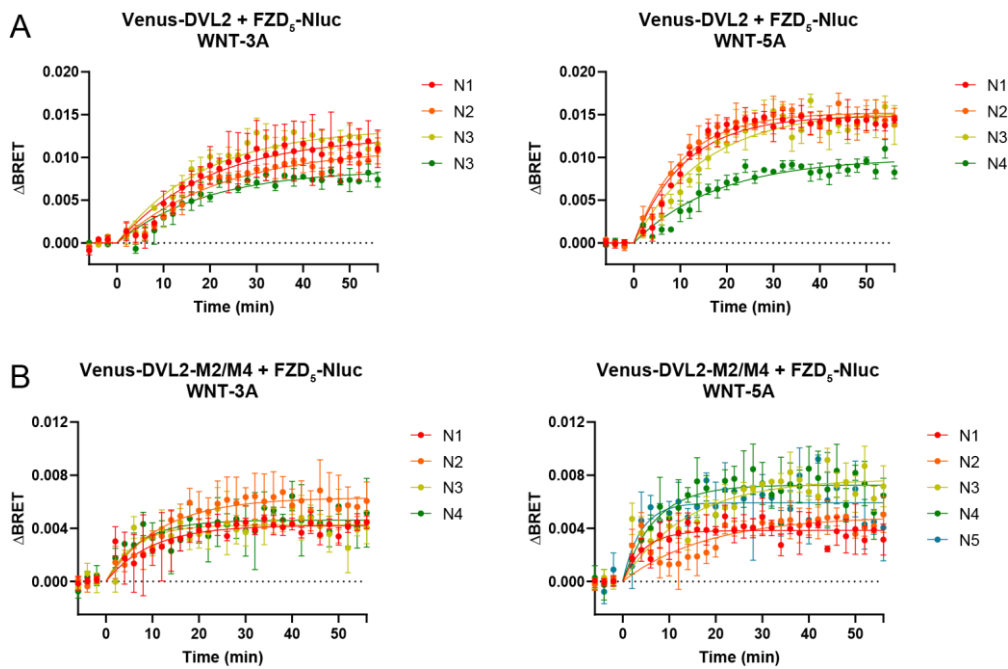

**Fig. S2. Kinetic analysis of the WNT-induced conformational dynamics of FZD<sub>5</sub>-DVL2 interaction.** (A-B) The kinetic BRET responses were monitored between (A) Venus-DVL2 or (B) DVL2-M2/M4 mutant and FZD<sub>5</sub>-Nluc (Venus:Nluc ratio 25:1) in  $\Delta$ FZD<sub>1-10</sub> cells with stimulation of either WNT-3A (1  $\mu$ g/ml) or WNT-5A (1  $\mu$ g/ml). Graphs show four to five independent experiments (N1-N5) with means  $\pm$  SD. Data were fitted using the plateau followed by one phase association equation.

## Figure S3

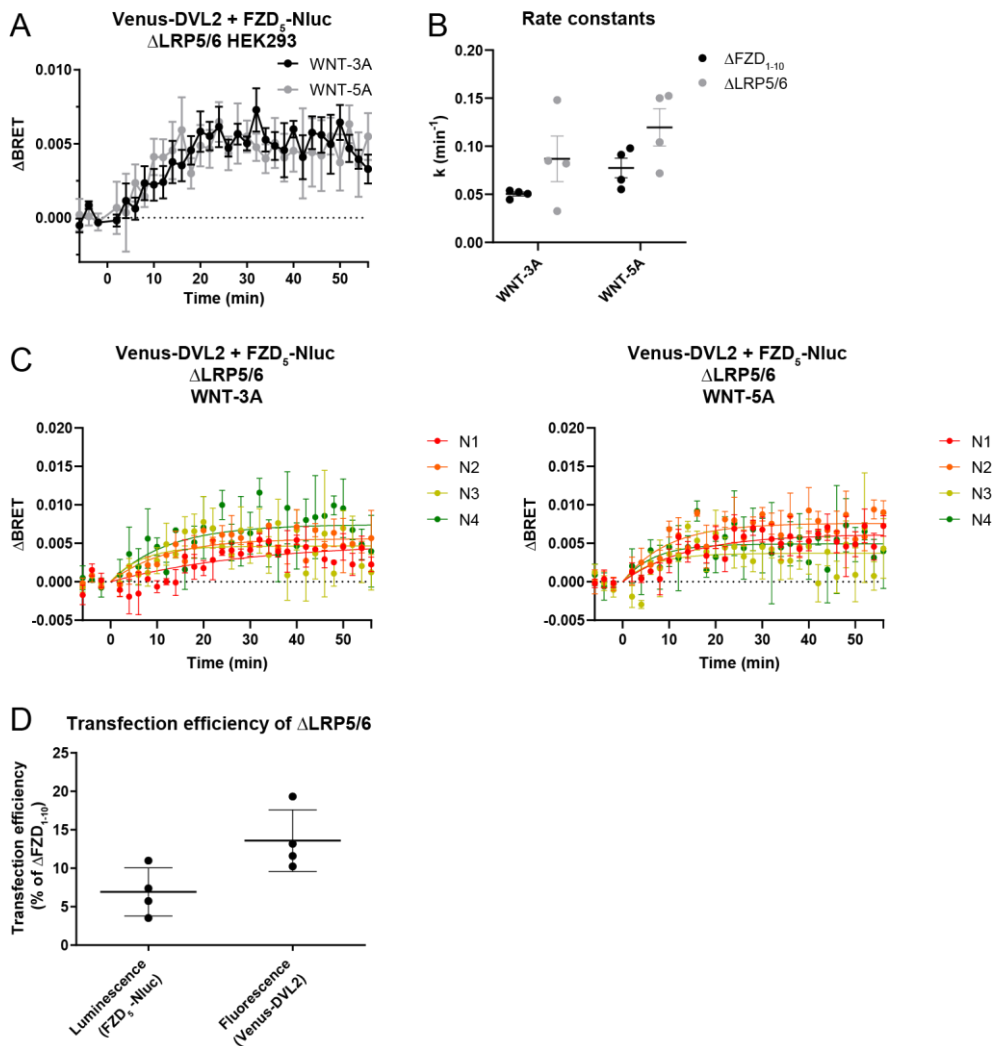

**Fig. S3. WNT-induced FZD<sub>5</sub>-DVL2 conformational dynamics is independent from LRP5/6.** (A) The kinetic BRET response was monitored between Venus-DVL2 and FZD<sub>5</sub>-Nluc (Venus:Nluc ratio 25:1) in ΔLRP5/6 cells during stimulation with 1 μg/ml of WNT-3A or WNT-5A. Data are presented as mean ± SEM of four independent experiments. (B) Comparison of Venus-DVL2 rate constants, *k*, in ΔFZD<sub>1-10</sub> and ΔLRP5/6 cells upon WNT stimulation. Data were extracted from Fig. S2A and S3C. No statistically significant difference was found between ΔFZD<sub>1-10</sub> and ΔLRP5/6 cells (two-way ANOVA with Fisher's LSD post hoc analysis). (C) Kinetic fits for WNT-induced conformational dynamics of

DVL2-FZD<sub>5</sub> in  $\Delta$ LRP5/6 cells. Graphs show four independent experiments (N1-N4) with means  $\pm$  SD. Data were fitted using the plateau followed by one phase association equation.

**(D)** The transfection efficiency of  $\Delta$ LRP5/6 cells was compared to that of  $\Delta$ FZD<sub>1-10</sub> cells.

Luminescence and fluorescence values are from the wells stimulated with 1  $\mu$ g/ml of WNT in experiments from Fig. 1C ( $\Delta$ FZD<sub>1-10</sub>) or from wells stimulated with WNTs in Fig. S3A

( $\Delta$ LRP5/6). Data are presented as mean  $\pm$  SEM of four independent experiments.



## Figure S4

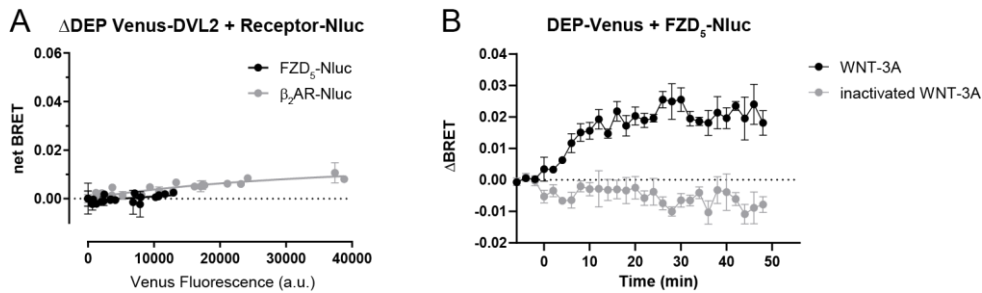

**Fig. S4. Validation of the direct FZD<sub>5</sub>-DEP BRET approach.** (A) The DEP domain of DVL2 is essential for basal FZD<sub>5</sub>-DVL recruitment.  $\Delta$ DEP Venus-DVL2 was titrated with a fixed amount of Nluc-FZD<sub>5</sub> in  $\Delta$ FZD<sub>1-10</sub> cells to assess basal recruitment of  $\Delta$ DEP DVL2 to FZD<sub>5</sub>;  $\beta_2$ AR was used as negative control. net BRET is presented as mean  $\pm$  SD of three independent experiments. (B) The kinetic BRET response was monitored between DEP-Venus and FZD<sub>5</sub>-Nluc (Venus:Nluc ratio 50:1) in  $\Delta$ FZD<sub>1-10</sub> cells with stimulation of either WNT-3A (1  $\mu$ g/ml) or inactivated WNT-3A (1  $\mu$ g/ml). Data are presented as mean  $\pm$  SEM of three independent experiments.

Figure S5

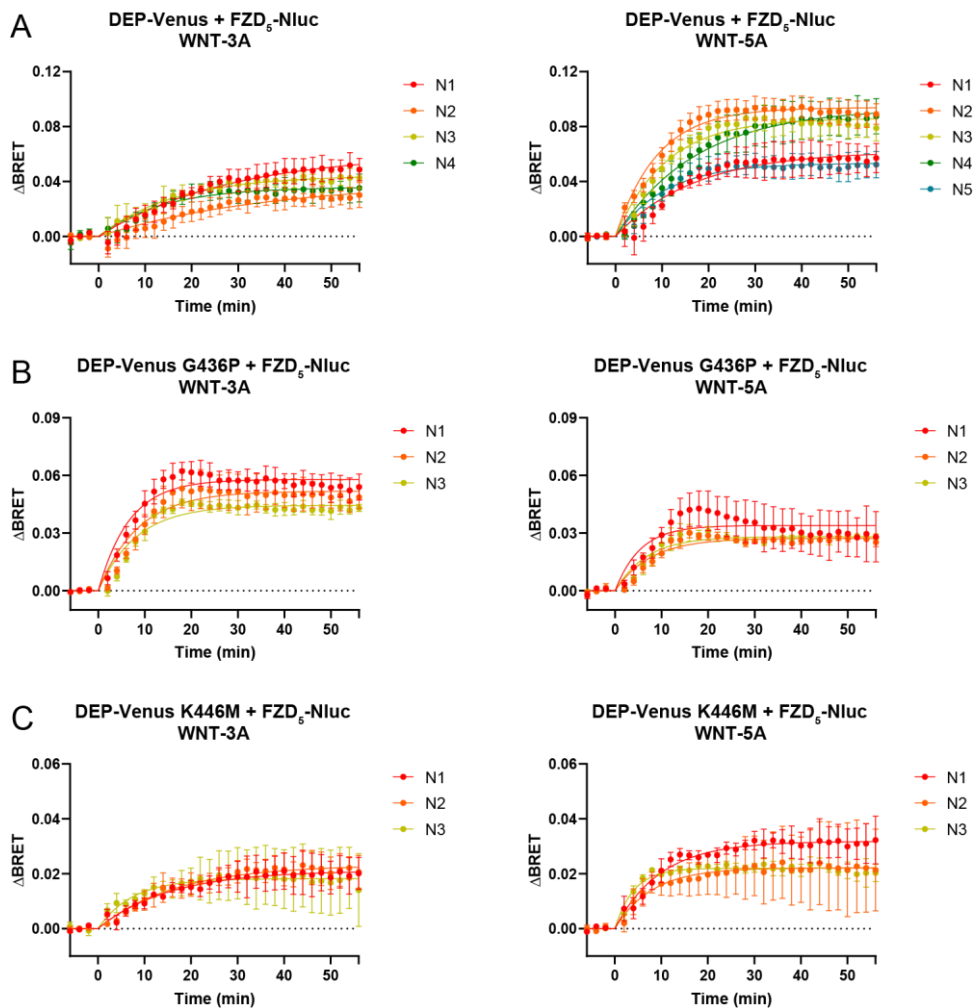

**Fig. S5. Kinetic analysis of WNT-induced conformational dynamics of FZD<sub>5</sub>-DEP**

**interaction.** (A-C) The kinetic BRET responses were monitored between DEP-Venus, its respective mutants and FZD<sub>5</sub>-Nluc (Venus:Nluc ratio 25:1) in  $\Delta$ FZD<sub>1-10</sub> cells with stimulation of either WNT-3A (1  $\mu$ g/ml) or WNT-5A (1  $\mu$ g/ml). Graphs show three to five independent experiments (N1-N5) with means  $\pm$  SD. Data were fitted using the plateau followed by one phase association equation.
